# Supplementary material for: Visible-light-induced radical cascade sulfonylation/cyclization towards indole-fused pyridine derivatives
Source: Royal Society of Chemistry journal article supplement (doi:10.1039/d4ra08000a), 2025-01-01

## Supporting Information

### Visible-Light-Induced Radical Cascade Sulfonation/Cyclization towards Indole-fused Pyridine Derivatives

Qin Du <sup>a\*</sup>, Ruohan Pan <sup>b</sup>, Yu Chen <sup>b</sup>, Yucai Tang <sup>b</sup>

---

<sup>a</sup>*Department of Pharmacy, Changde Hospital, Xiangya School of Medicine, Central South University (The First People's Hospital of Changde City), Changde, Hunan 415003, China. E-mail: duqin1009@163.com*

<sup>b</sup>*College of Chemistry and Materials Engineering, Hunan University of Arts and Science, Engineering Technology Research Center of Key Preparation Technology of Biomedical Polymer Materials, Changde 415000, China.*

### Contents

|                                                                             |               |
|-----------------------------------------------------------------------------|---------------|
| <b>1. General Information.....</b>                                          | <b>S2</b>     |
| <b>2. General procedure.....</b>                                            | <b>S2</b>     |
| <b>3. Stern-Volmer fluorescence quenching experiments.....</b>              | <b>S2</b>     |
| <b>4. <sup>1</sup>H NMR and <sup>13</sup>C NMR spectra of products.....</b> | <b>S3-S29</b> |

## 1. General Information

All reagents and solvents were purchased from commercial suppliers and used without purifications. TLC was performed on silica gel plates (200-300 mesh) using UV light (254/365 nm) for detection and column chromatography was performed on silica gel (200-300 mesh). The  $^1\text{H}$  NMR and  $^{13}\text{C}$  NMR spectra were recorded at 25 °C in  $\text{CDCl}_3$  at 400 and 100 MHz, respectively, with TMS as the internal standard. Chemical shifts ( $\delta$ ) are expressed in ppm and coupling constants  $J$  are given in Hz. All reactions were performed on the photoreaction instrument (WP-TEC-1020SL), which are purchased from WATTCAS, China. Fluorescence spectra were performed on a F-7000 spectrophotometer (Hitachi Ltd., Japan) with excitation and emission slit widths of 5 nm.

## 2. General procedure

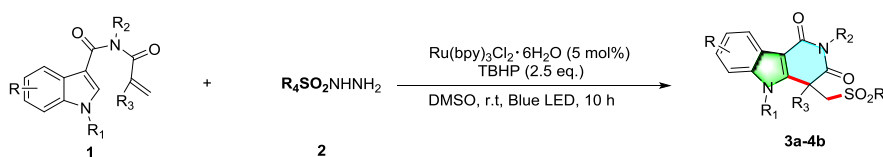

**Experimental Procedure:** To a stirred solution of **1** (0.25 mmol) in DMSO (2.0 mL) were added **2** (2.5 eq., 0.625 mmol),  $\text{Ru}(\text{bpy})_3\text{Cl}_2 \cdot 6\text{H}_2\text{O}$  (5 mol%) and TBHP (70% aqueous solution, 2.5 eq., 0.625 mmol). The resulting mixture was stirred in air under a 10W blue LEDs (460~465nm) and irradiated for 10 h. The temperature was maintained at 20~25 °C when the LED light was on. After the reaction was complete, the reaction mixture was diluted with a brine solution (25 mL) and extracted with EtOAc (30 mL $\times$ 3). The combined organic phase was dried over anhydrous  $\text{Na}_2\text{SO}_4$ , filtered and concentrated in vacuo. The residue was purified by flash column chromatography to afford the desired products **3a-4b**.

## 3. Stern-Volmer fluorescence quenching experiments

The fluorescence emission intensities were carried out on an F-7000 FL spectrophotometer (Hitachi Ltd, Japan) with excitation slit set at 5 nm and emission at 5 nm. The excitation wavelength was fixed at 450 nm, and the emission wavelength

was measured at 550~800 nm. The samples were prepared by mixing Ru(bpy)<sub>3</sub>Cl<sub>2</sub> · 6H<sub>2</sub>O (5.0 μm in DMSO) and different amount of TBHP (0.01M in DMSO) in a light path quartz fluorescence cuvette. For each quenching experiment, 0 μL, 50 μL, 150 μL and 250 μL stock solution of TBHP was titrated to the solution of Ru(bpy)<sub>3</sub>Cl<sub>2</sub> · 6H<sub>2</sub>O. Then the emission intensity was collected and the results were presented as follows:

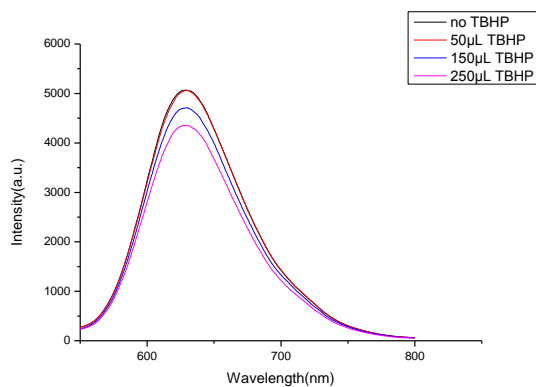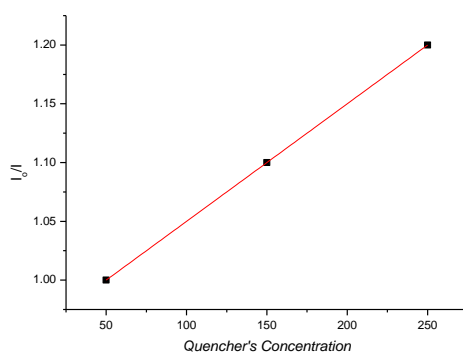

#### 4. <sup>1</sup>H NMR and <sup>13</sup>C NMR spectra of products

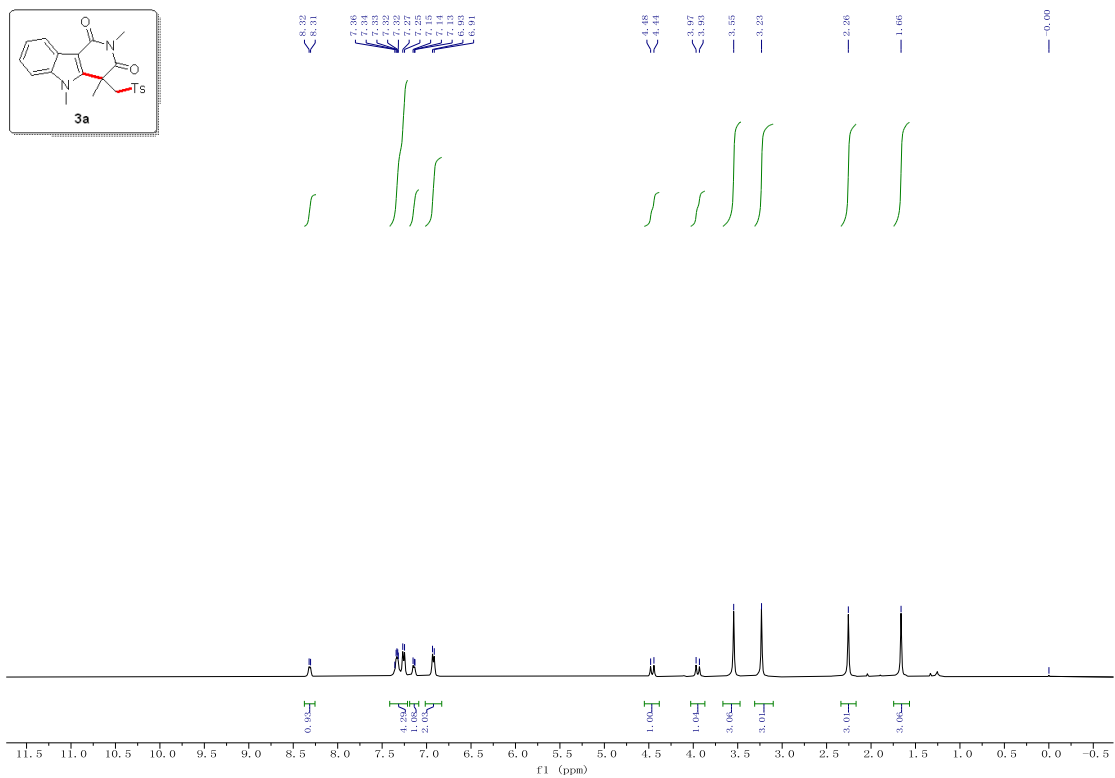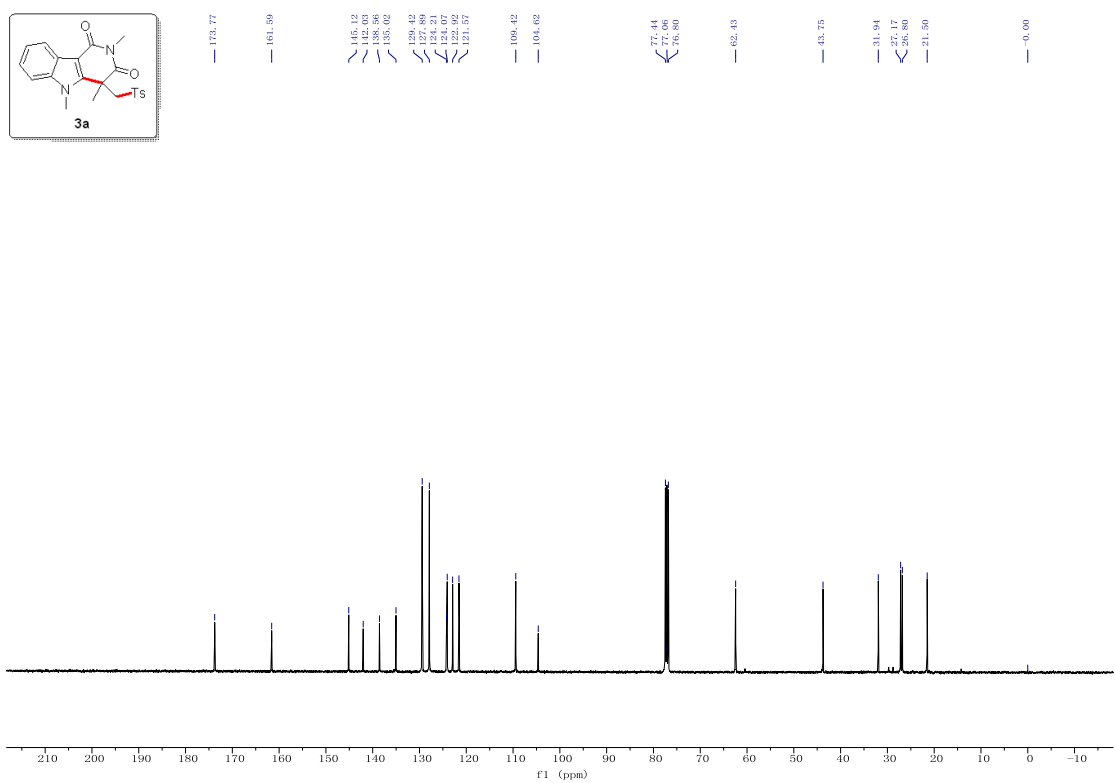

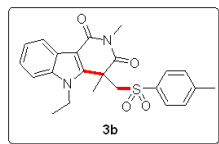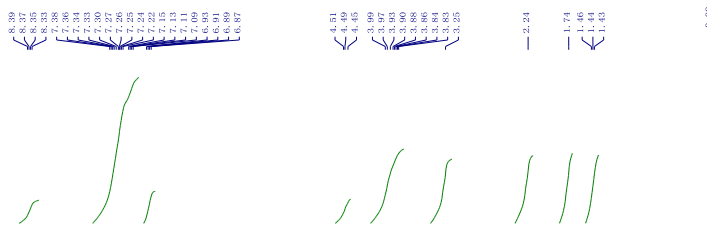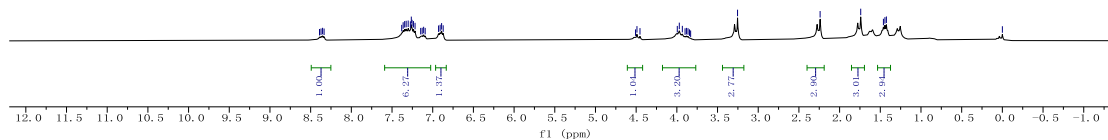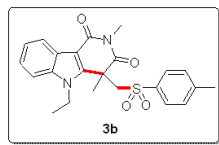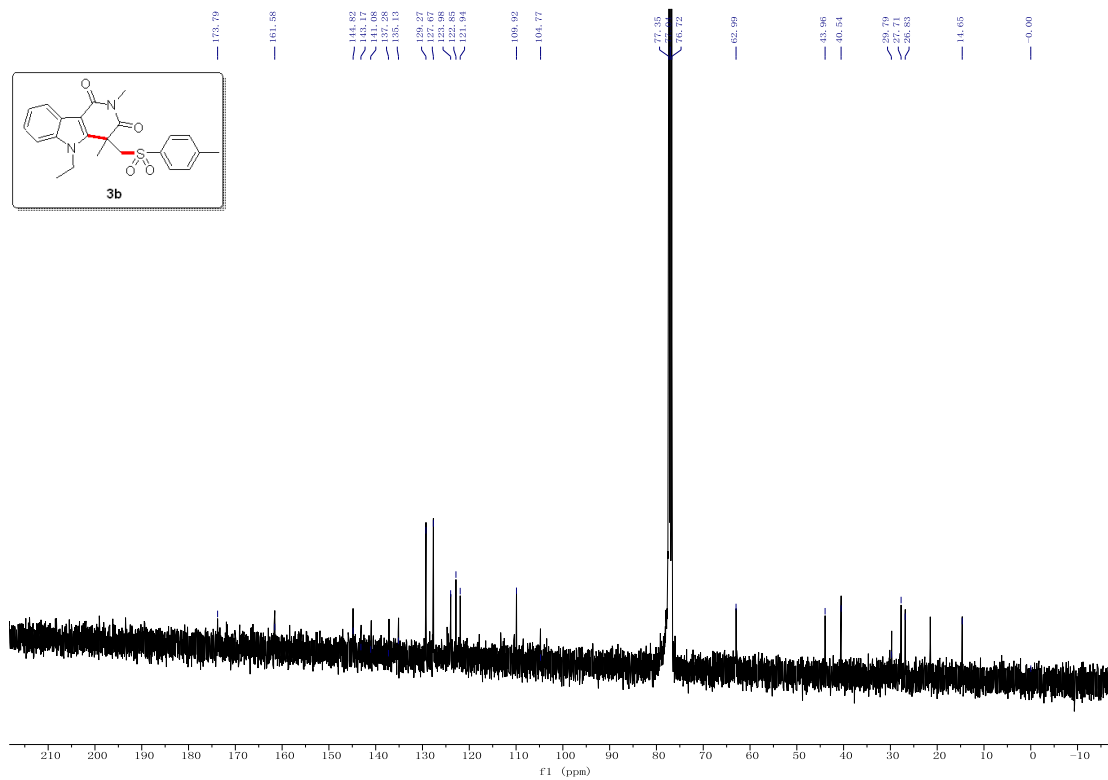

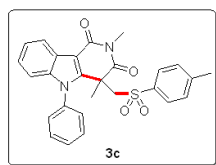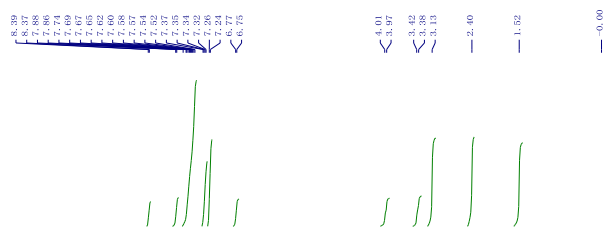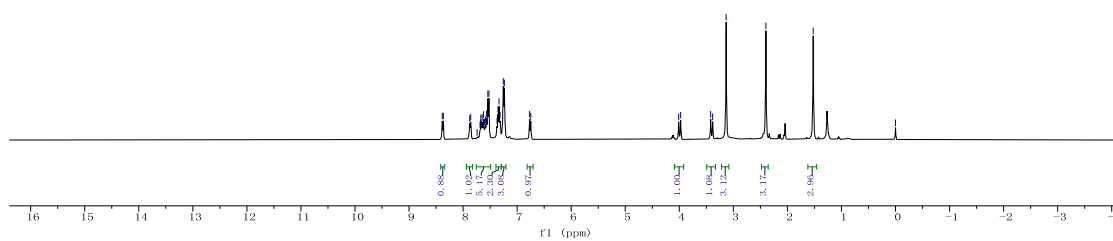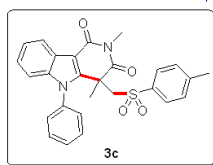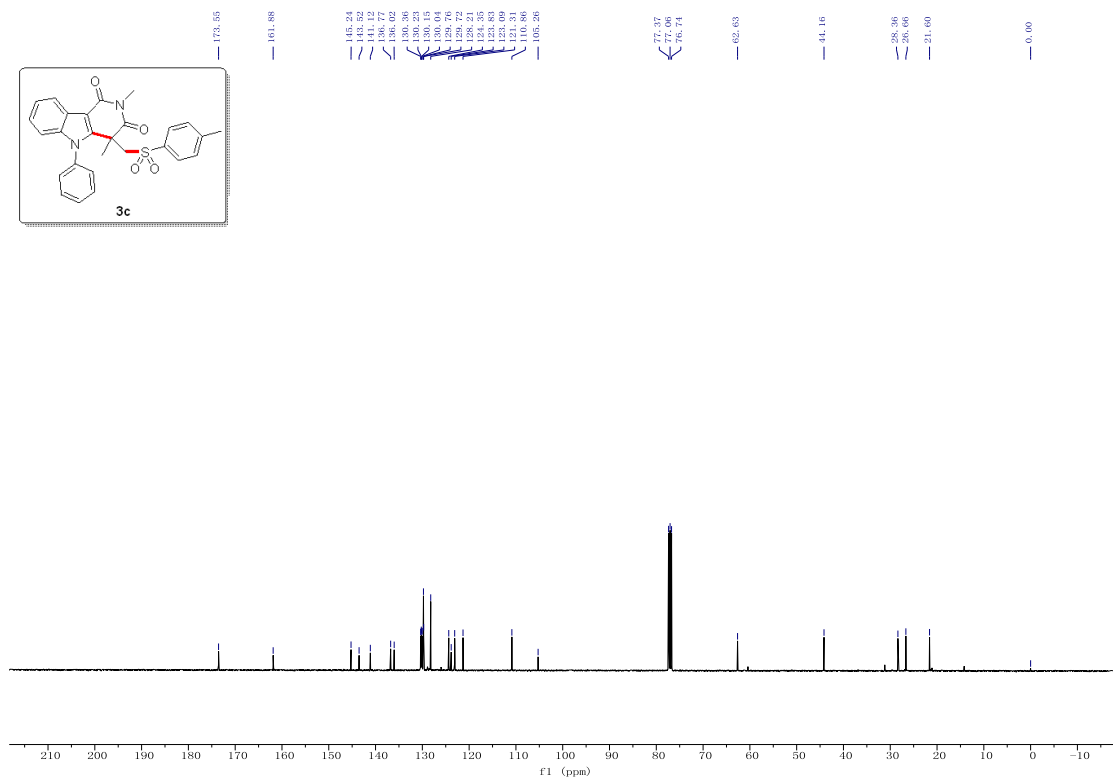

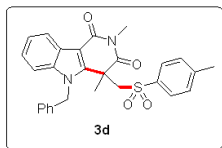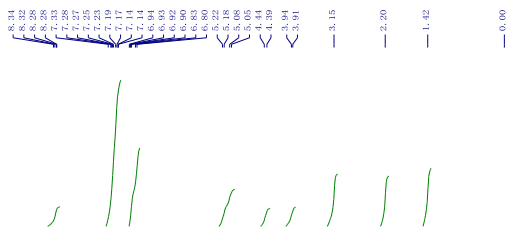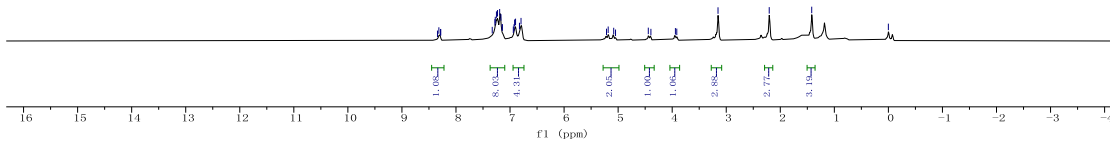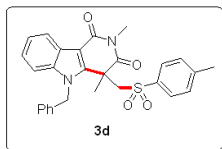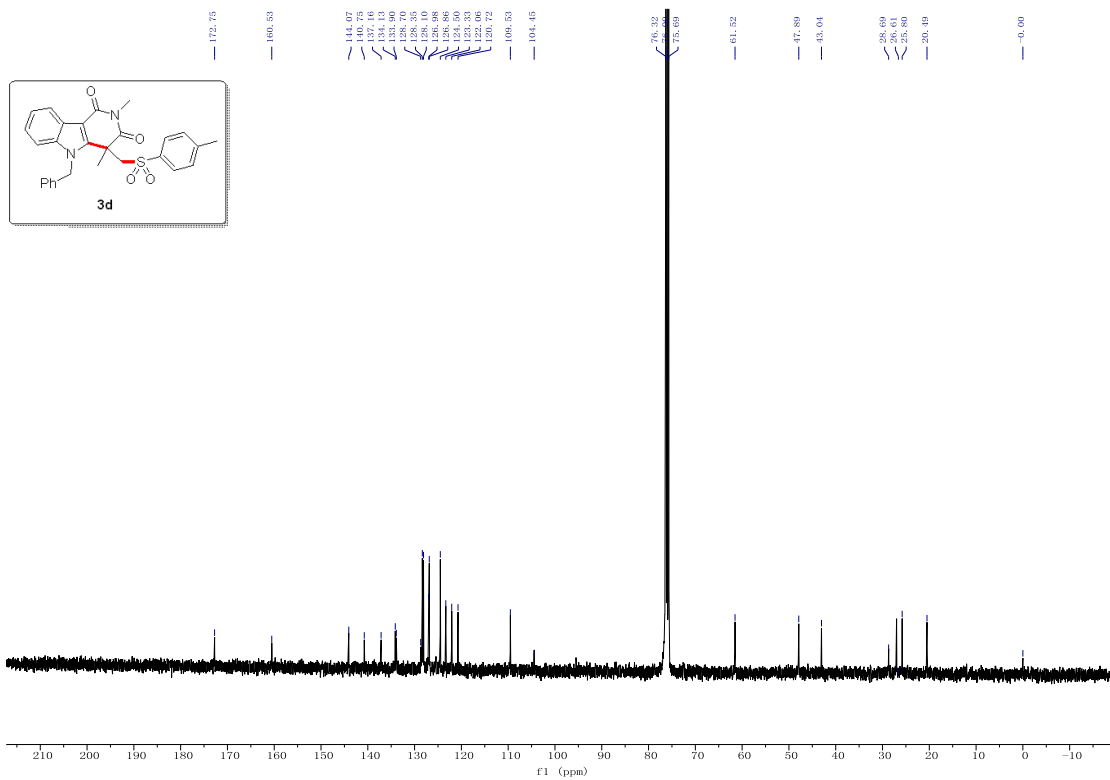

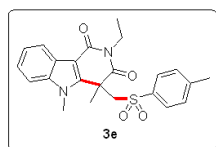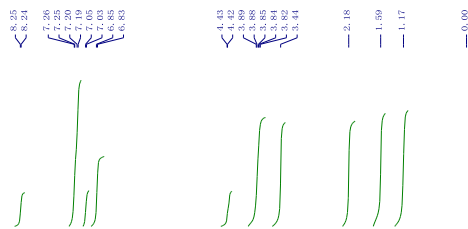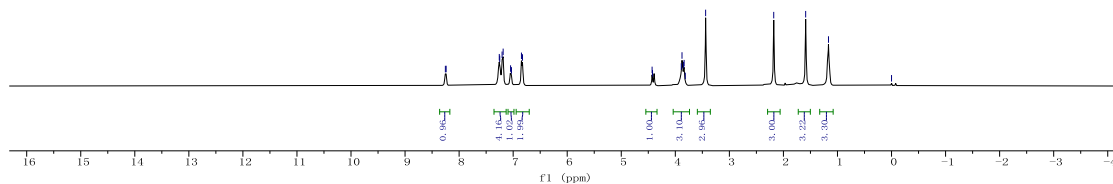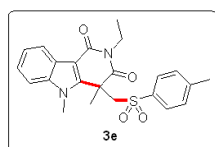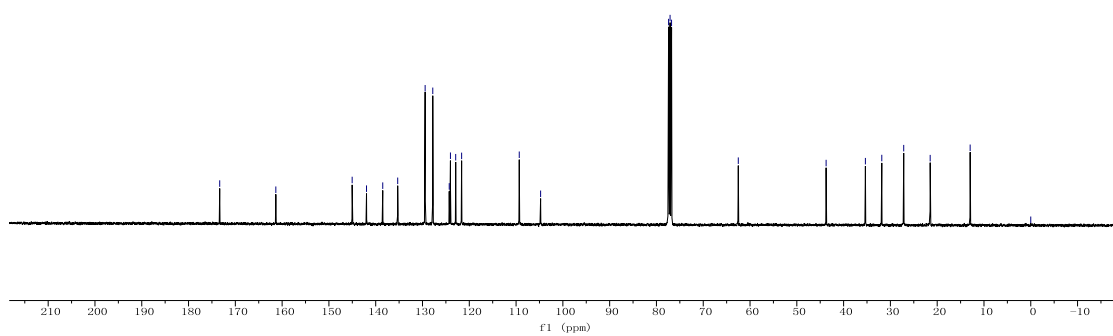



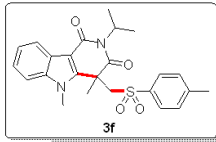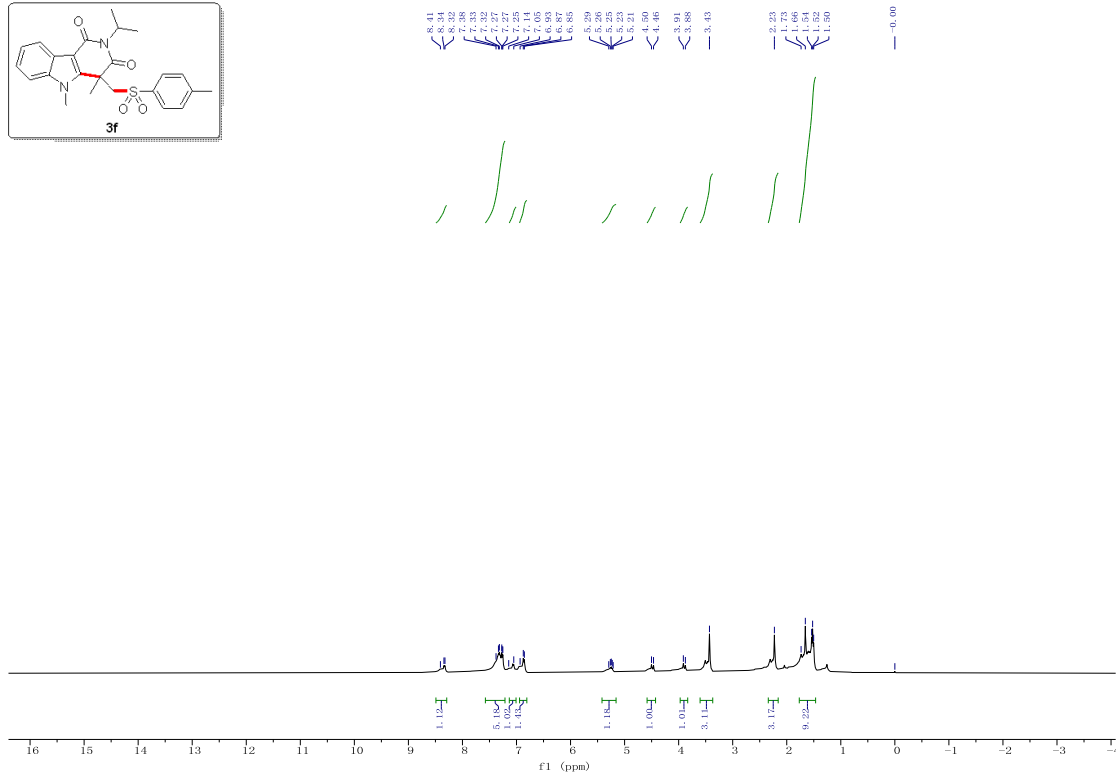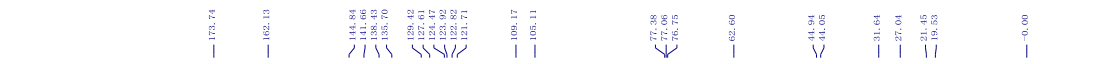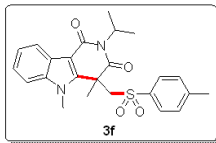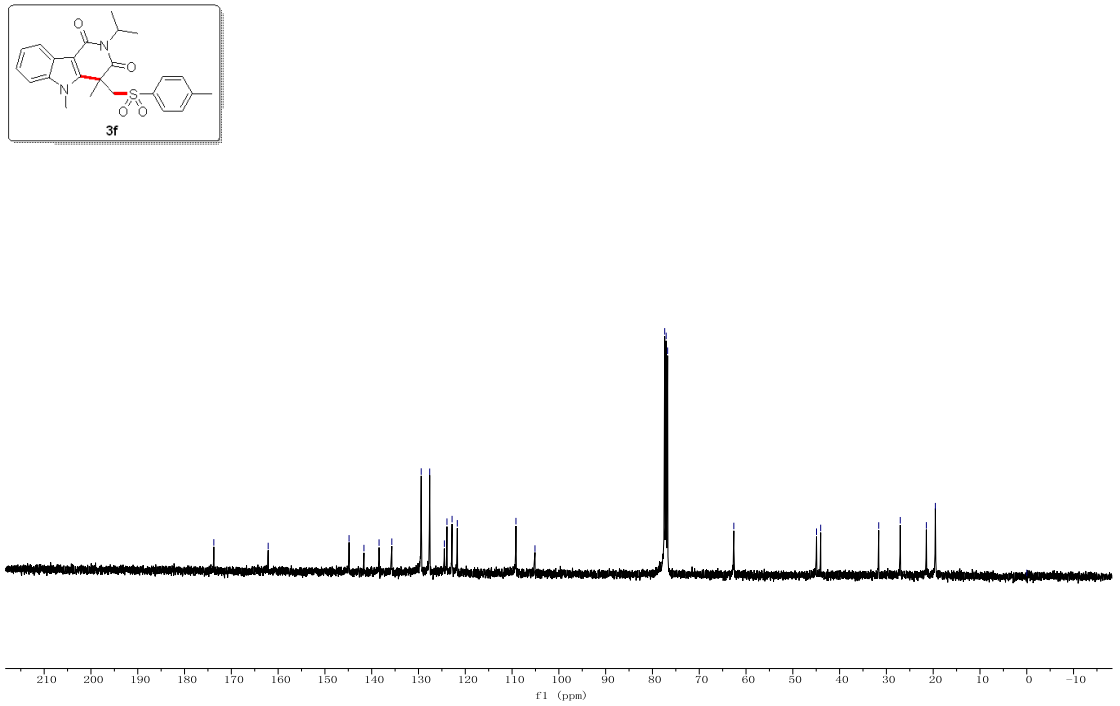

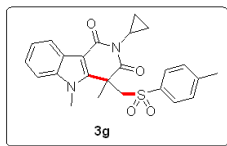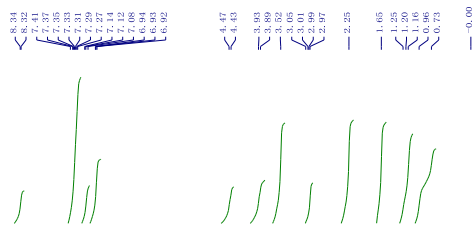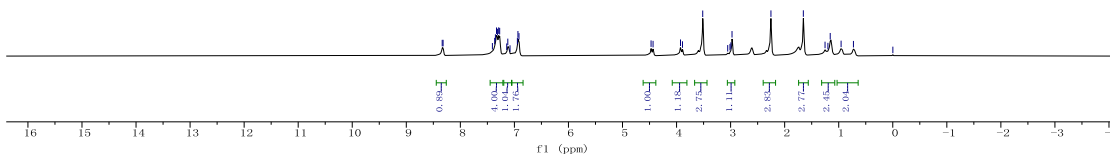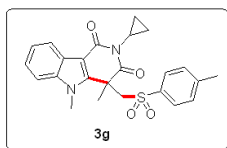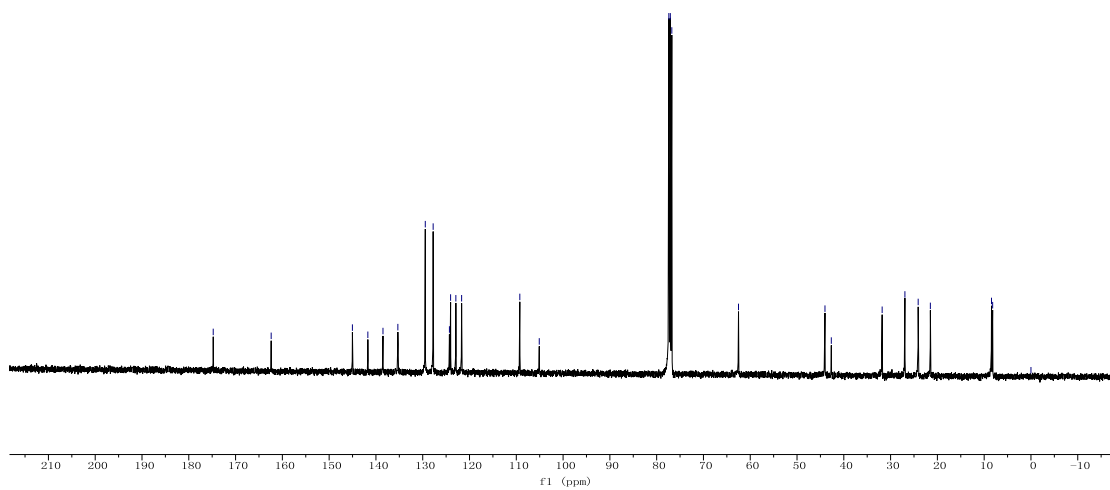

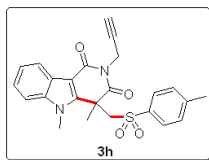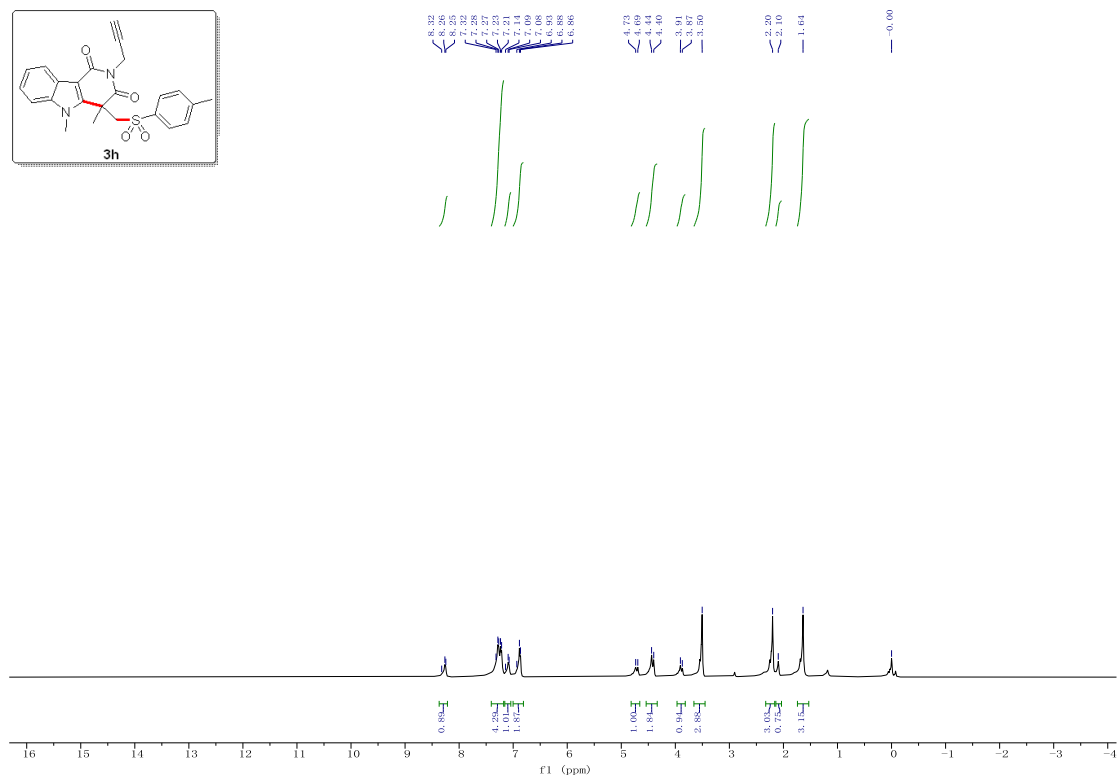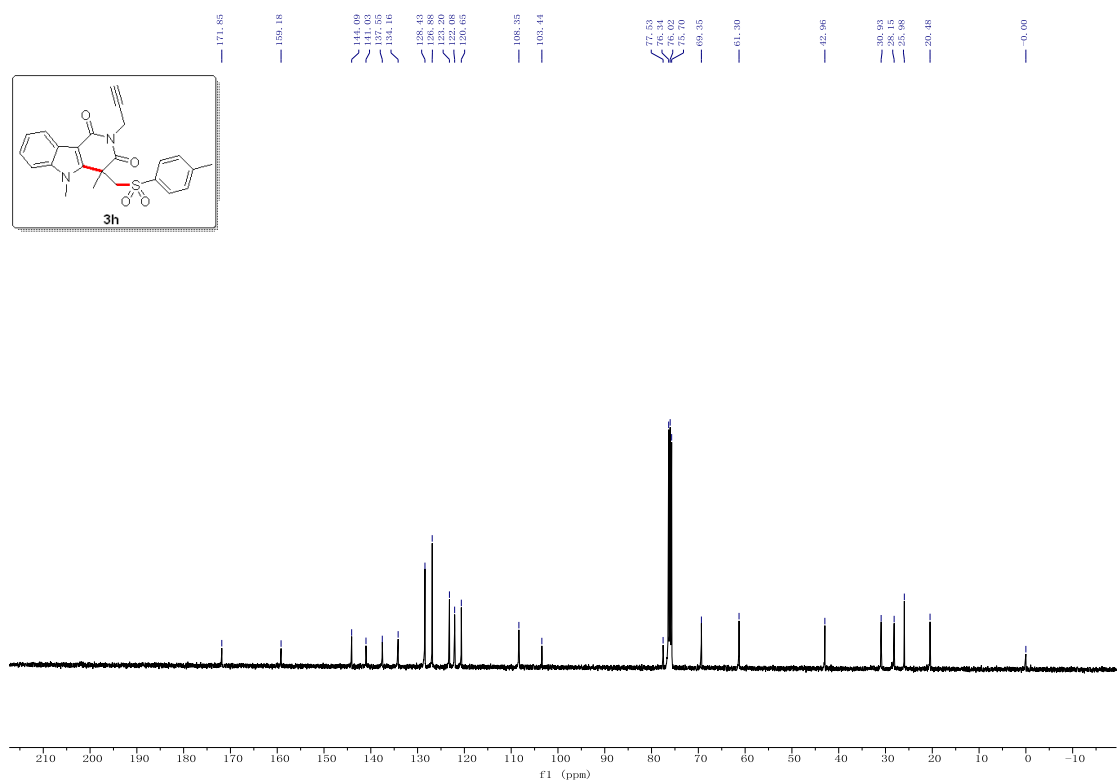

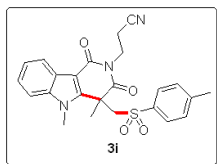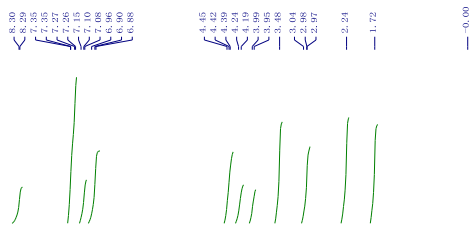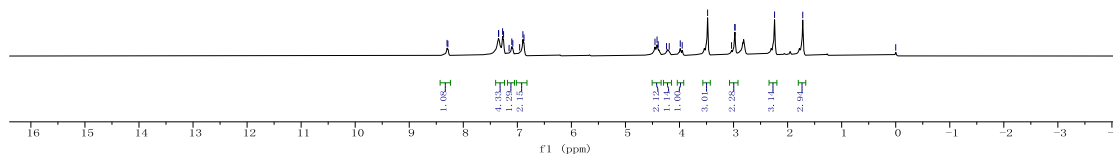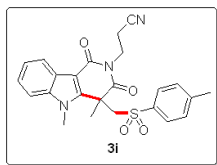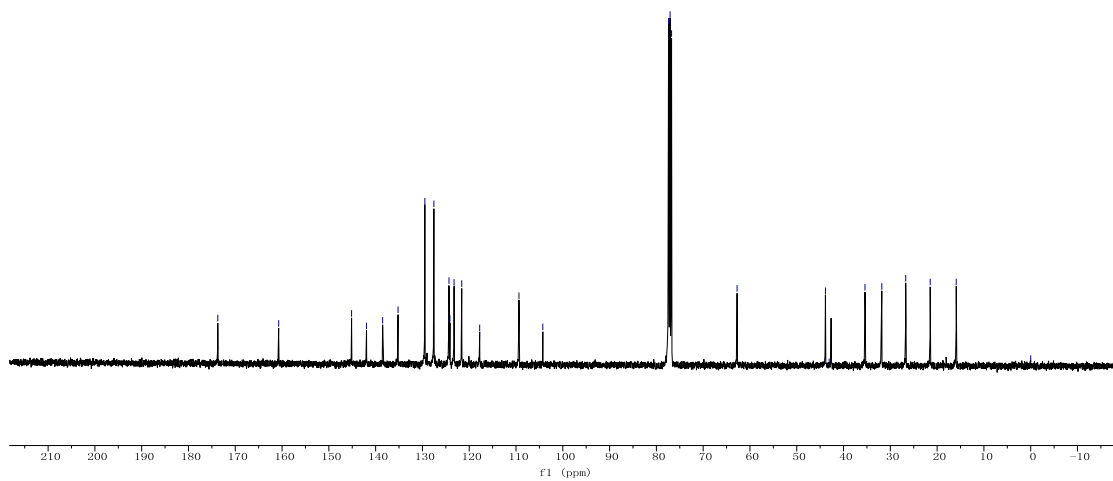

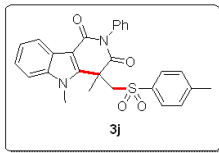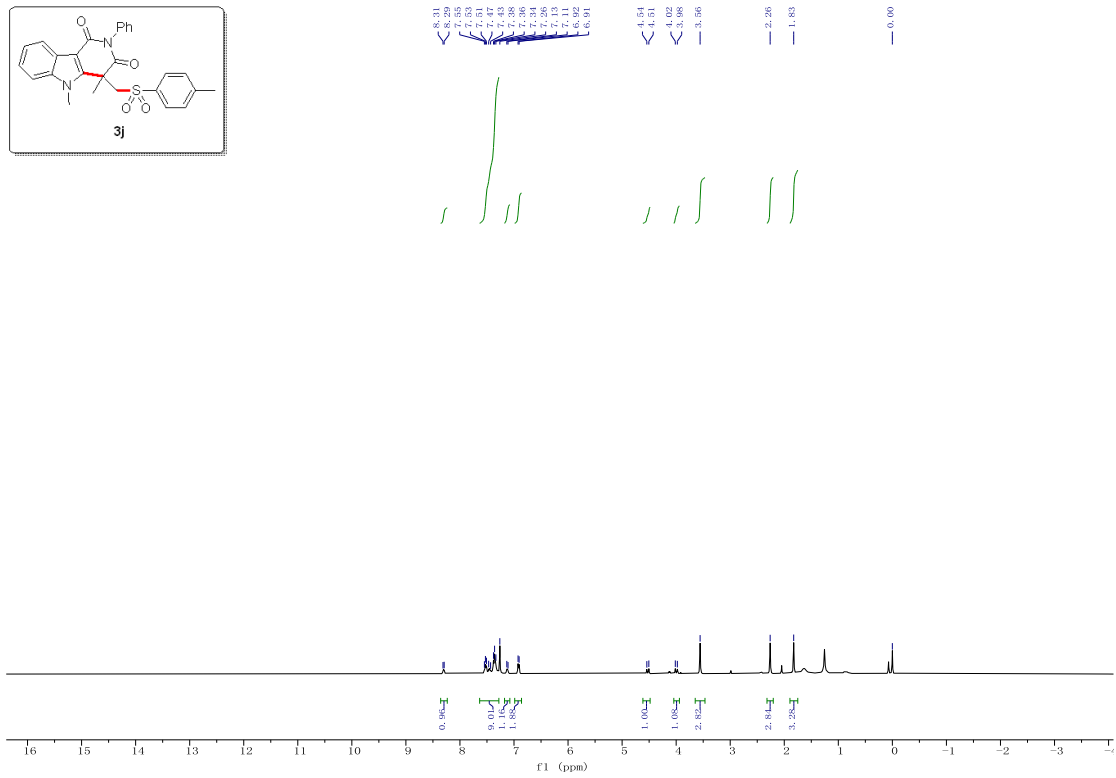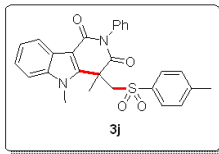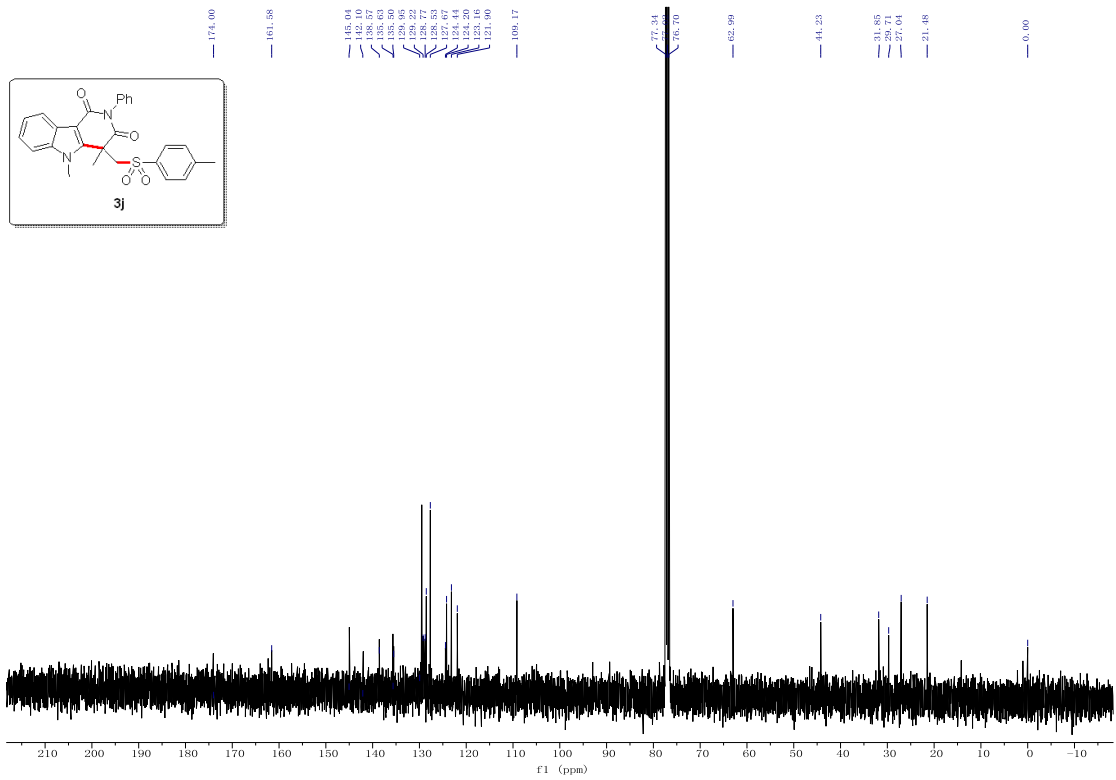

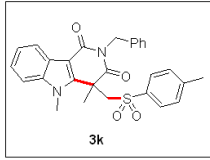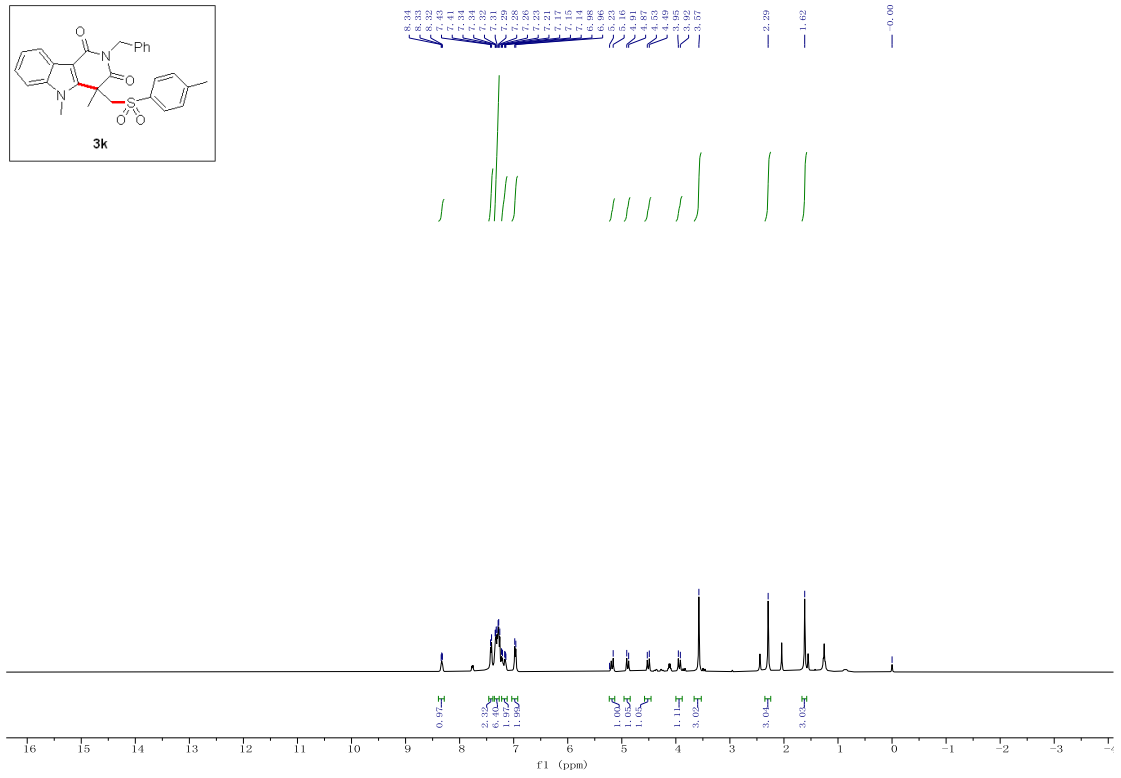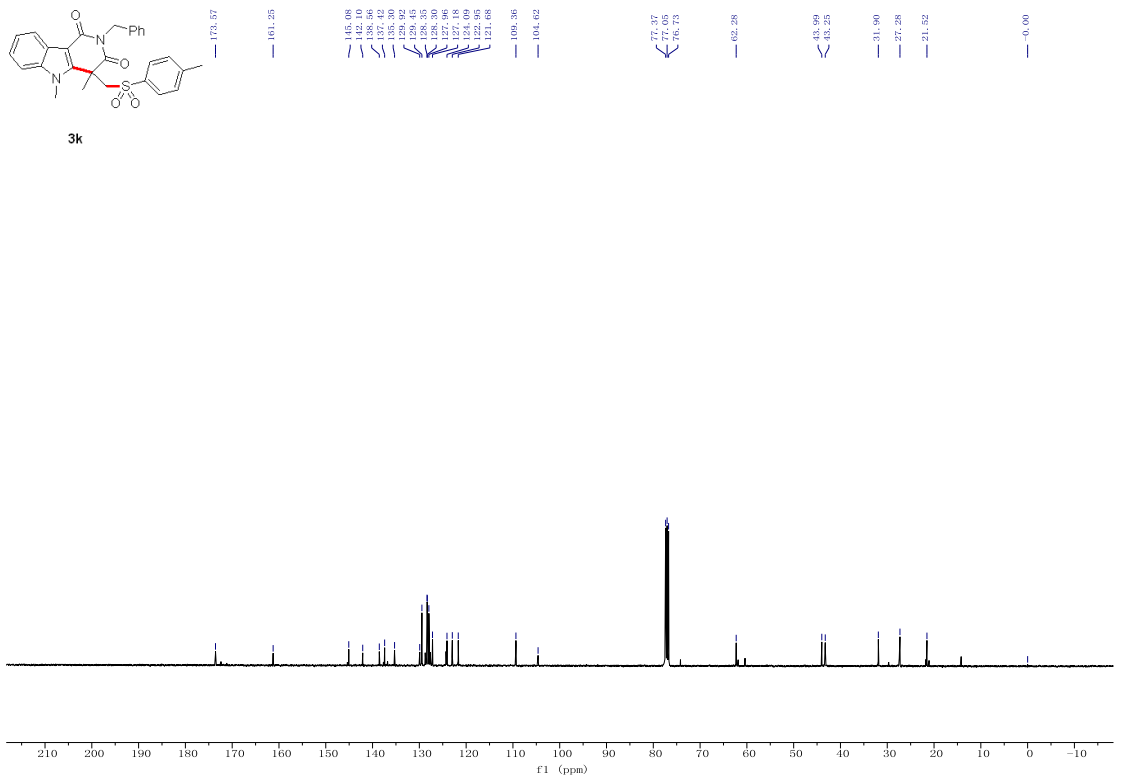

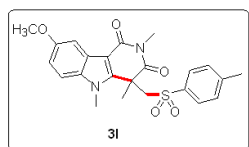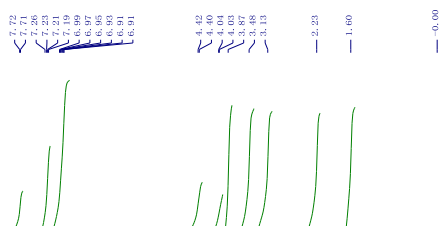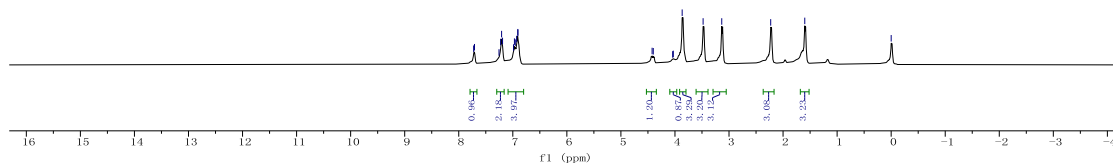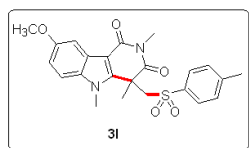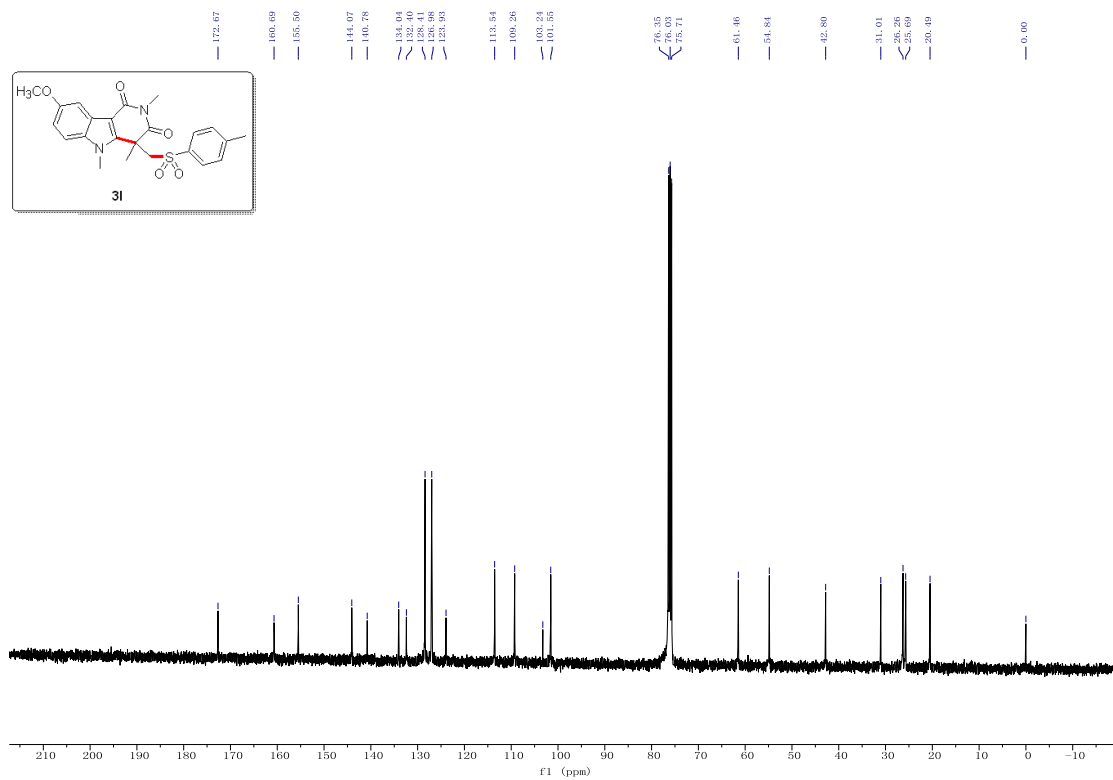

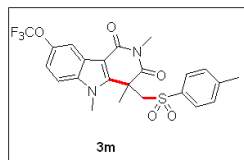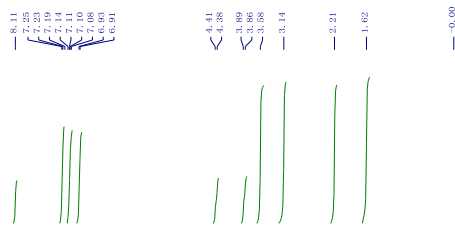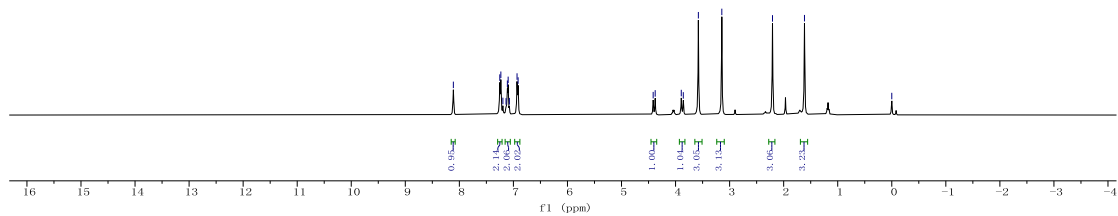

231433, 2, f1d

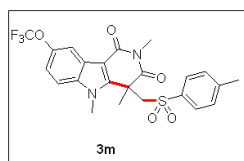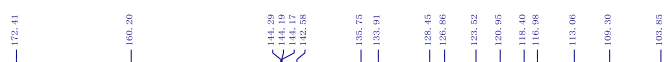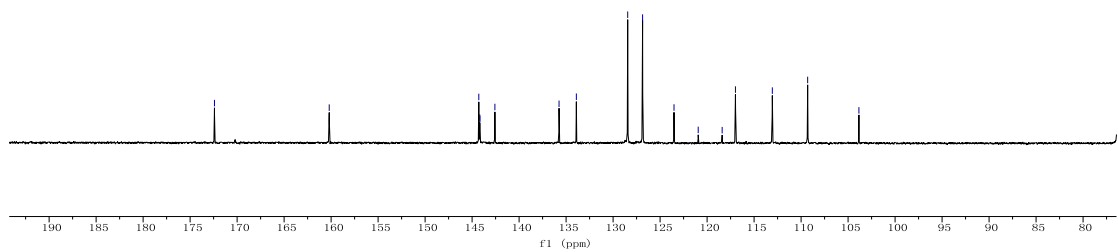



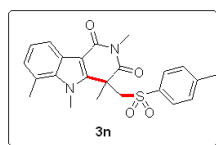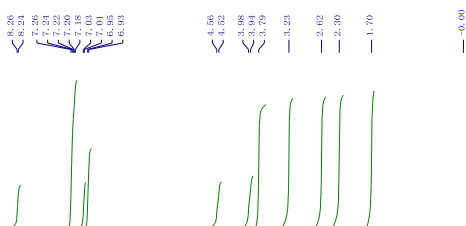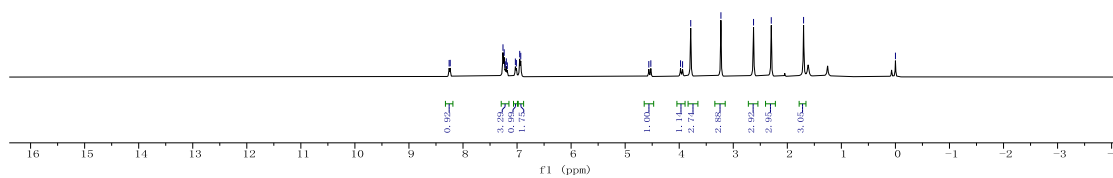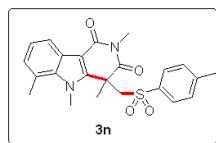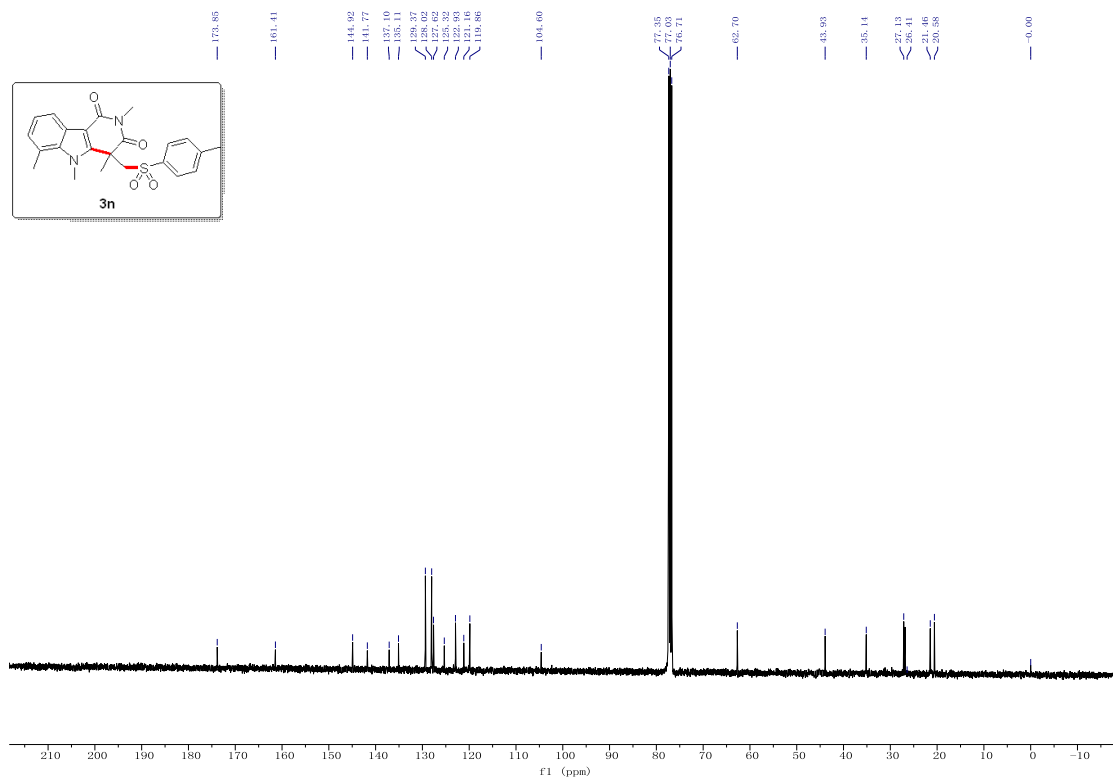

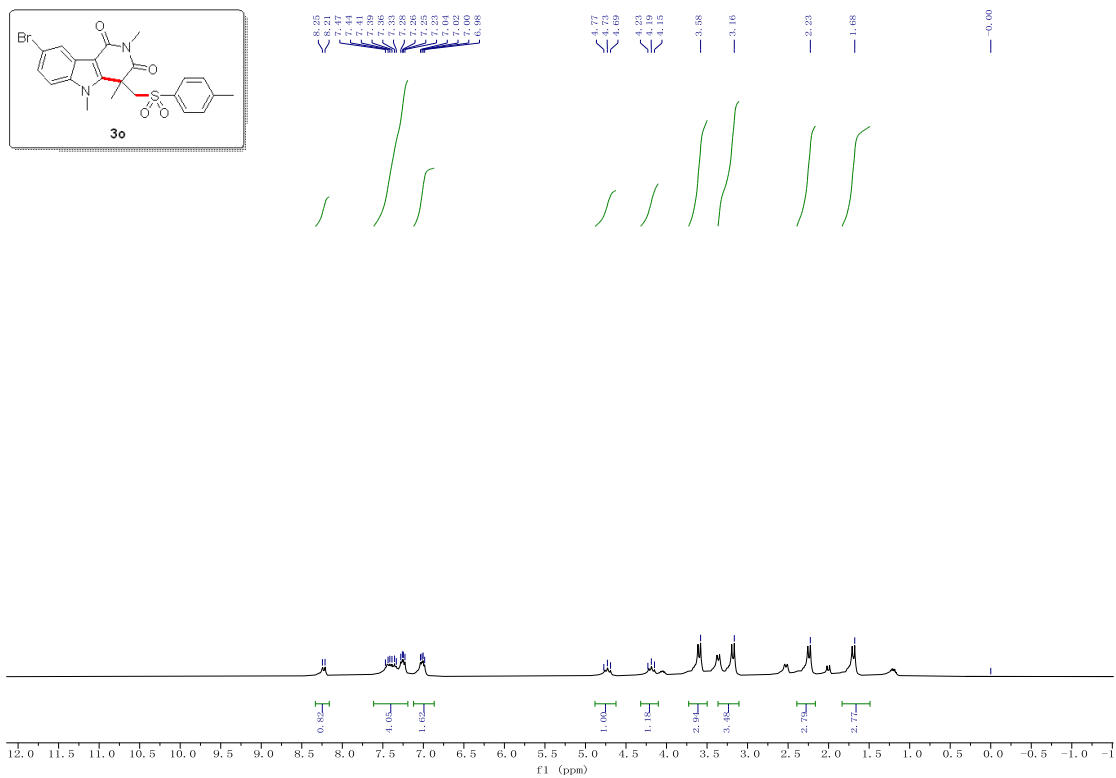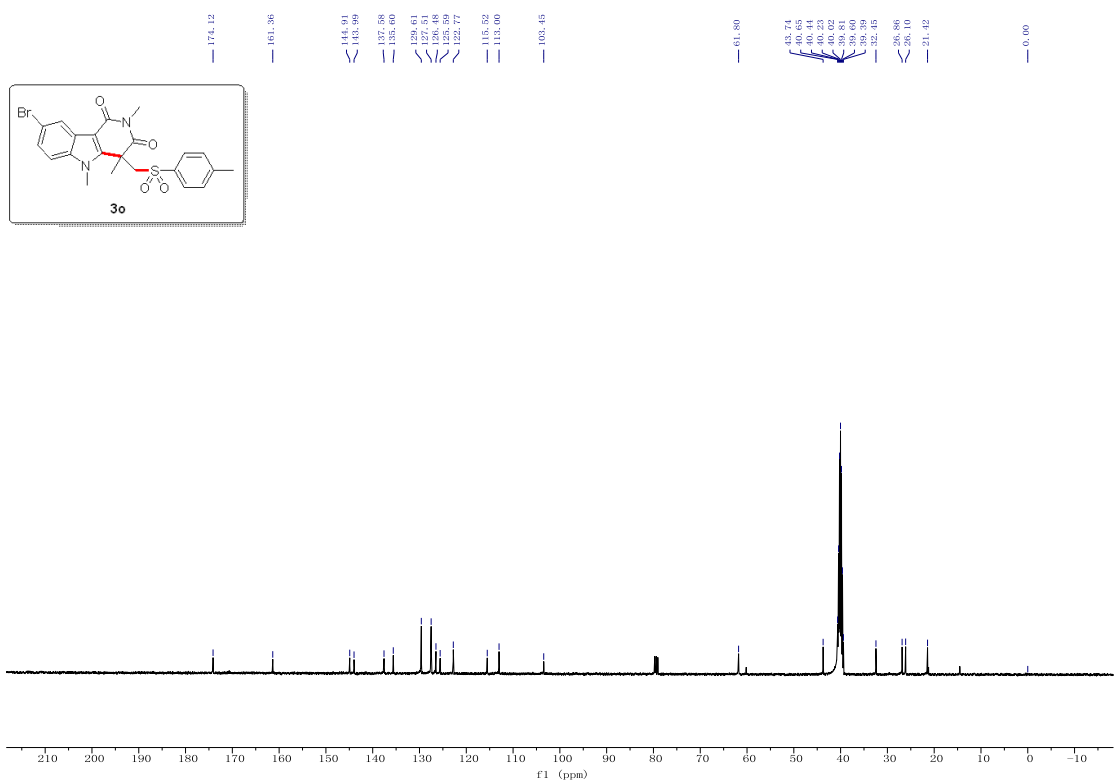

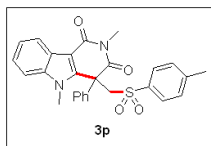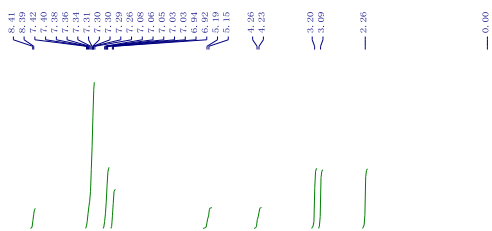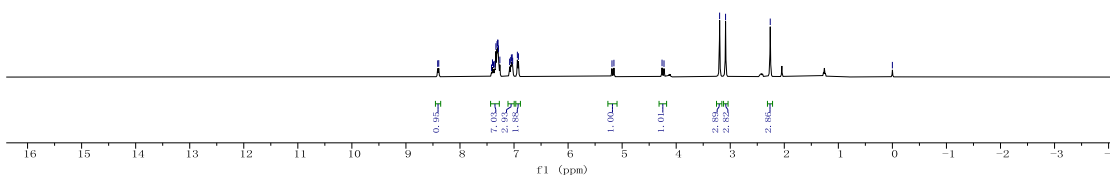

231430. 2. f1d

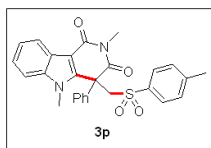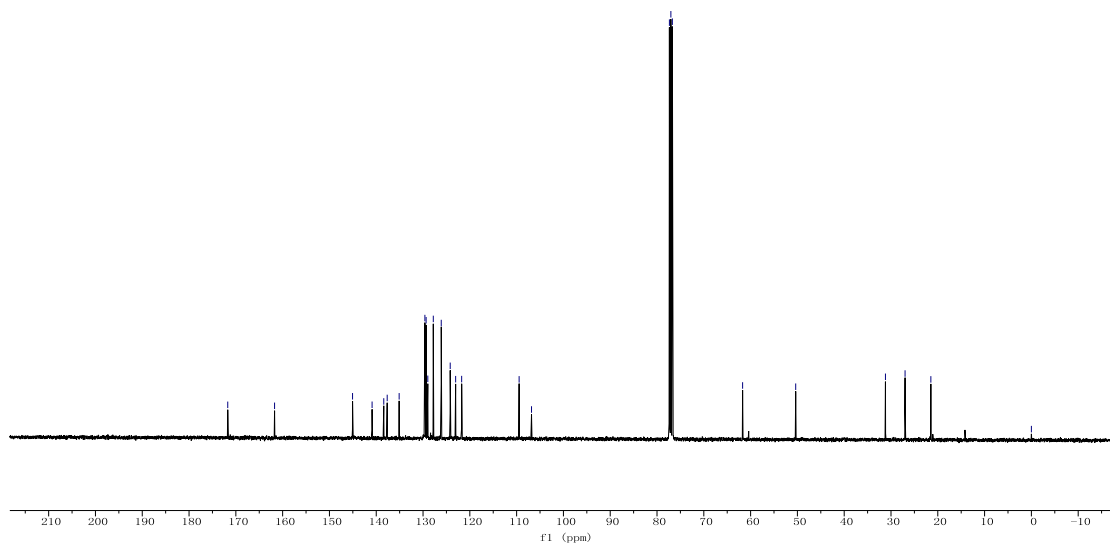

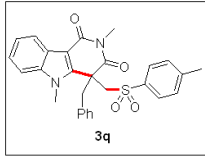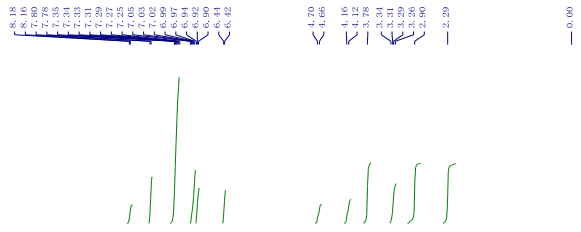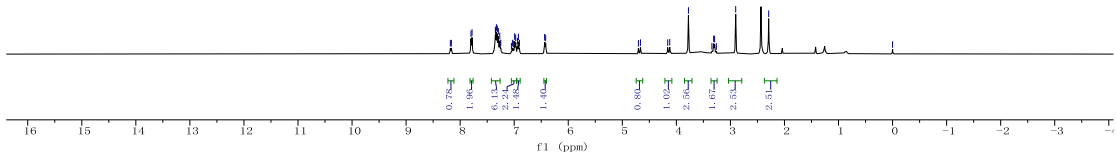

231431. 2. f1d

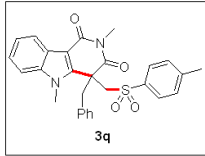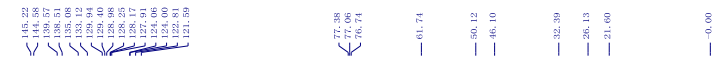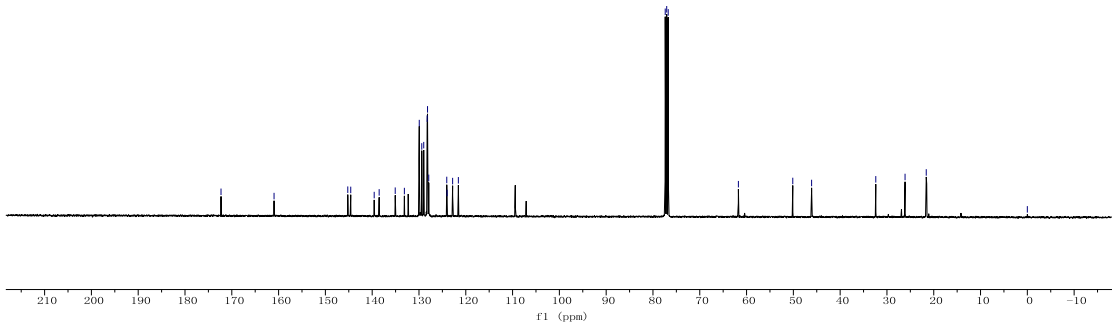

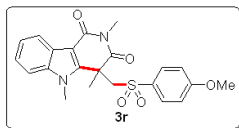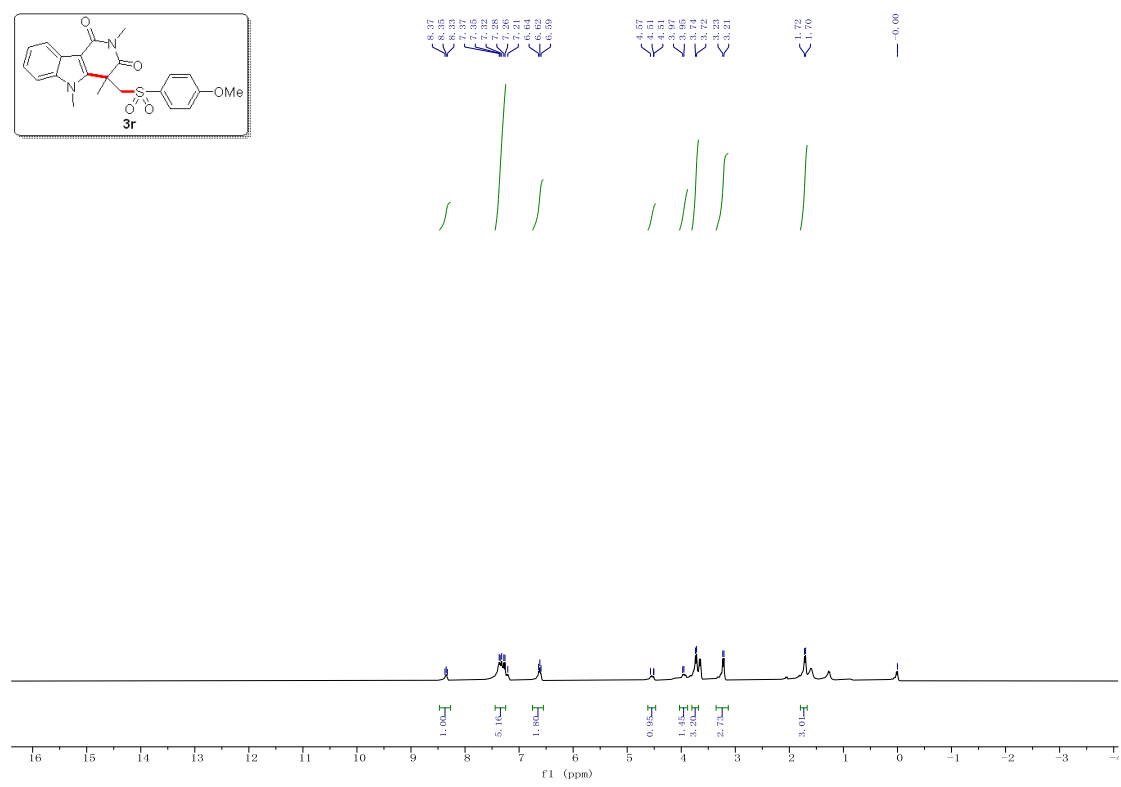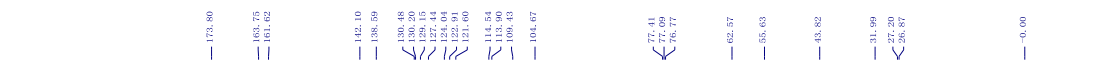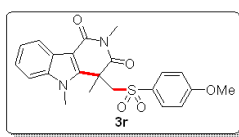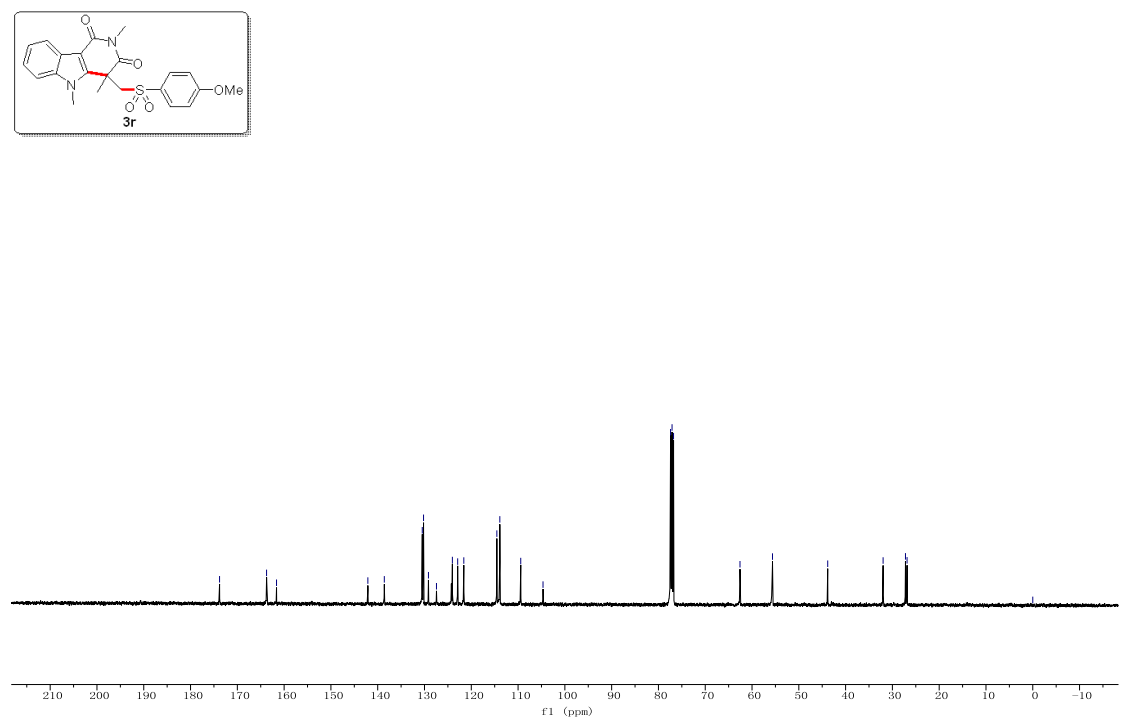

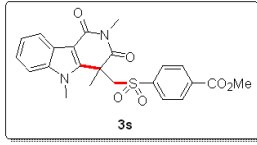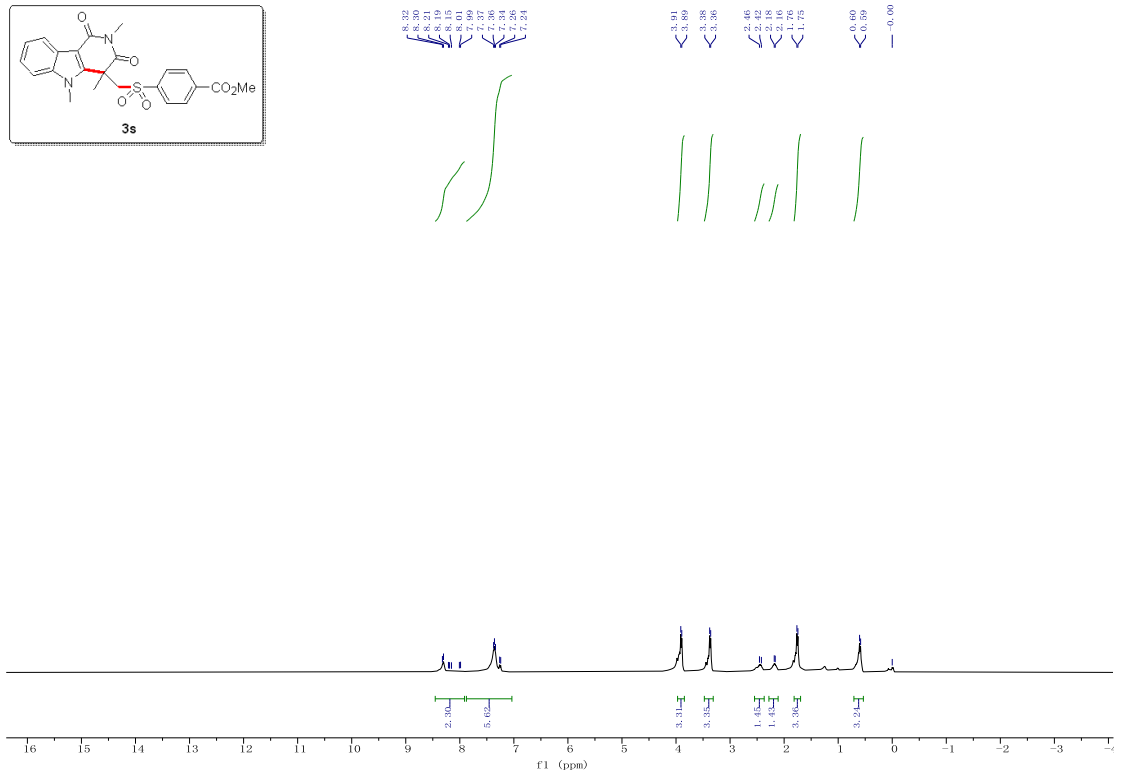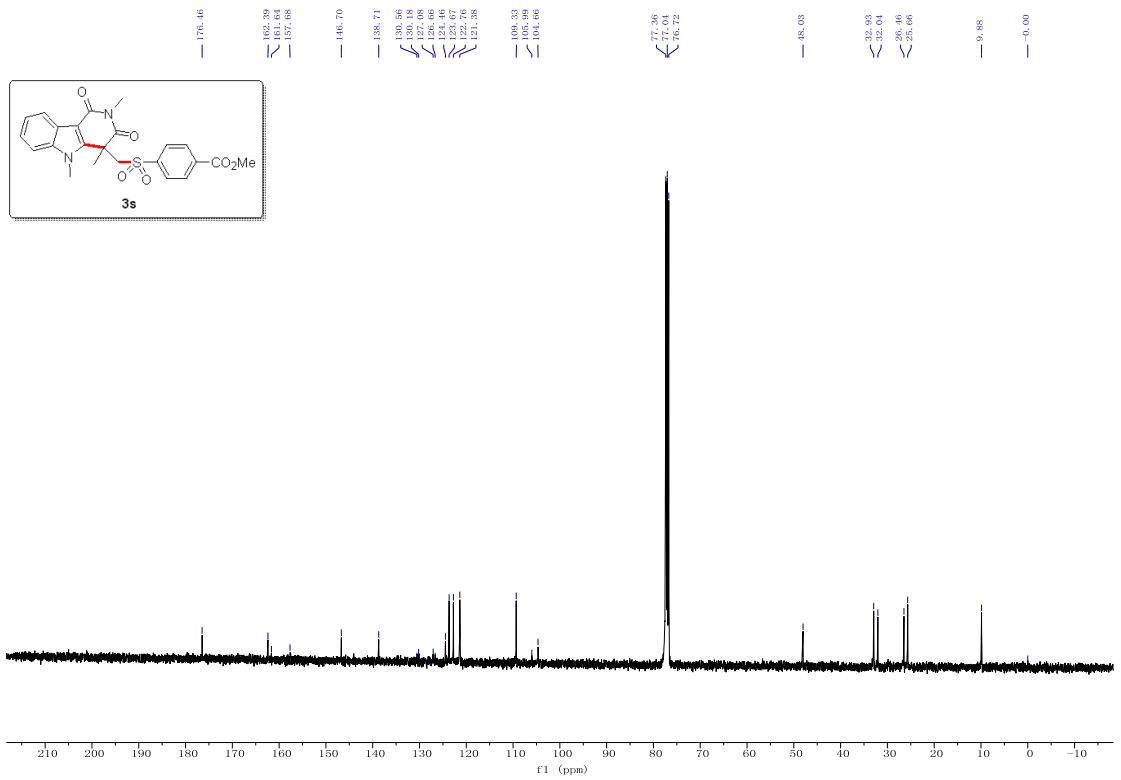

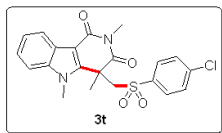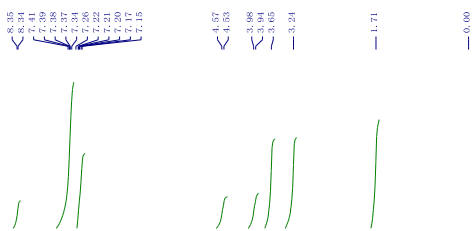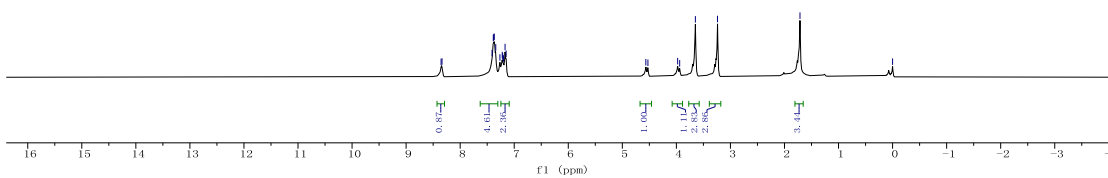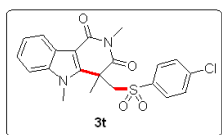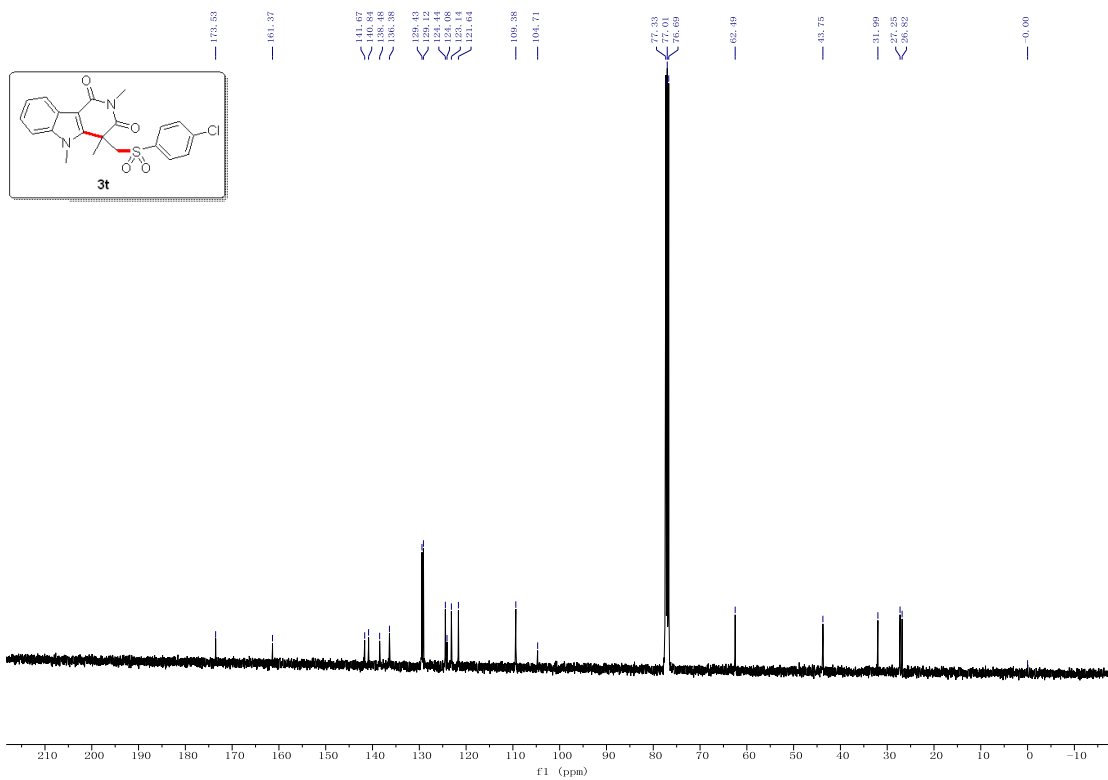

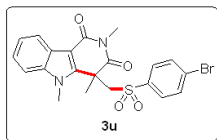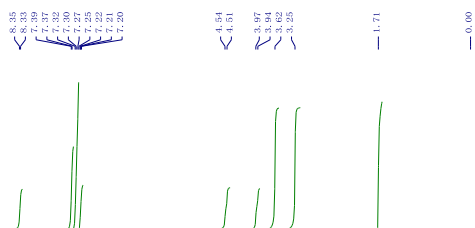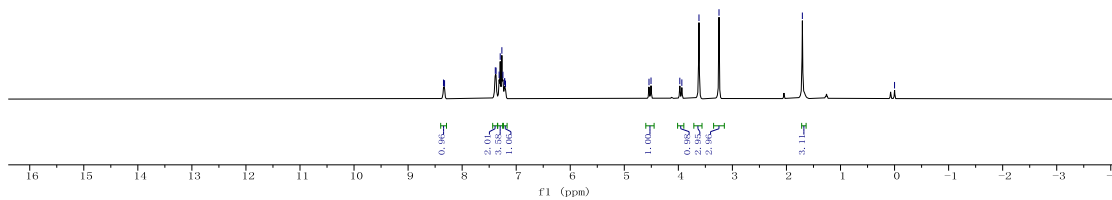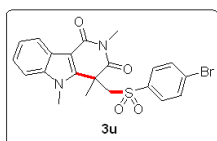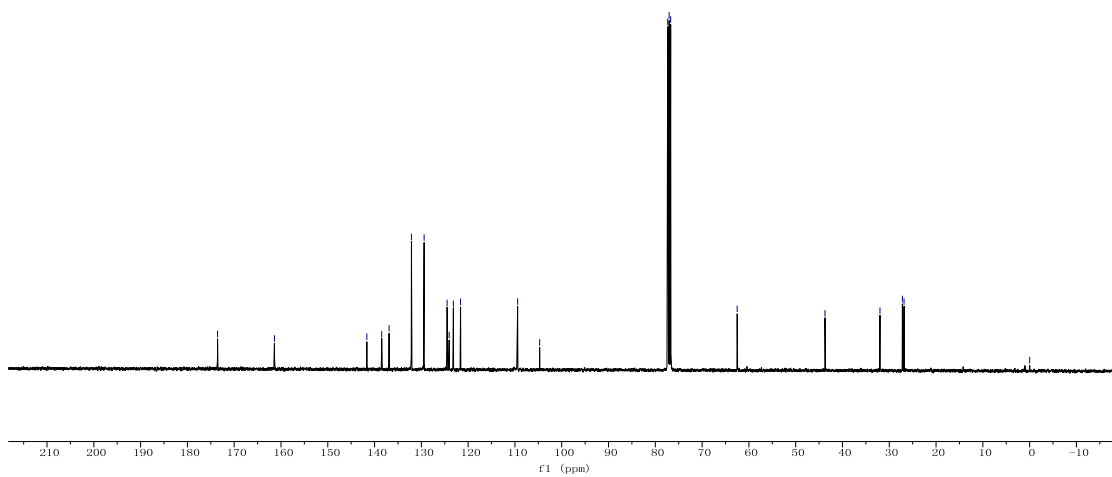



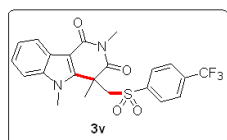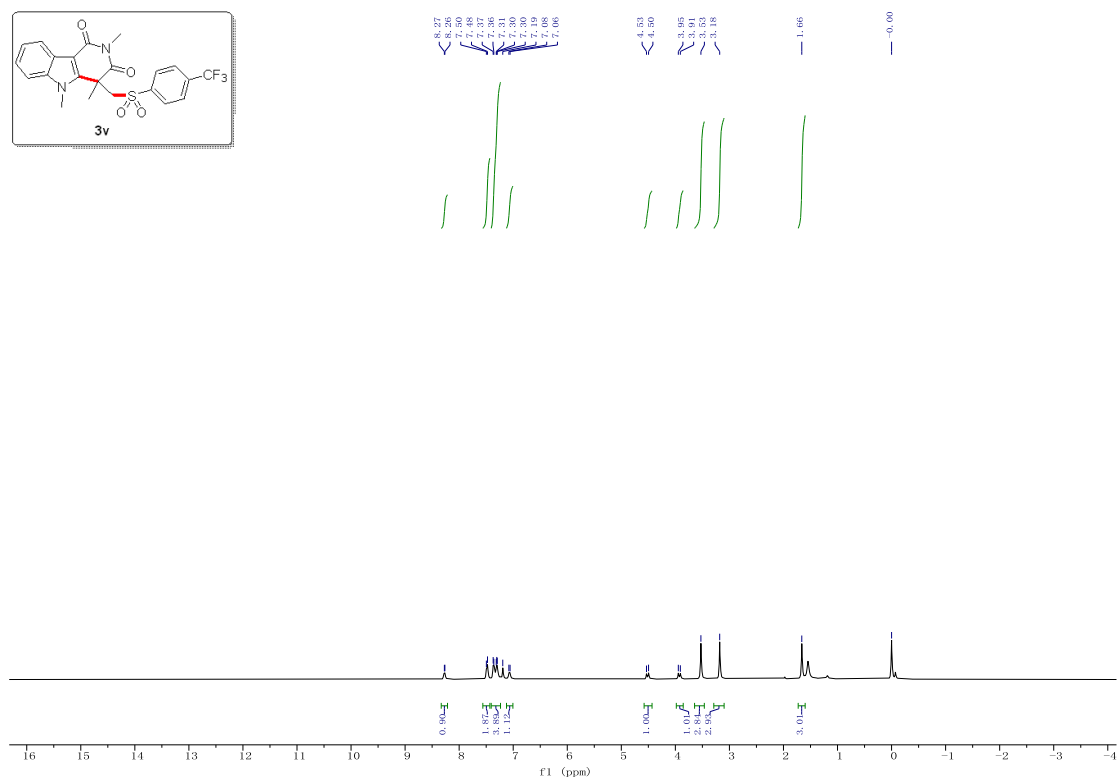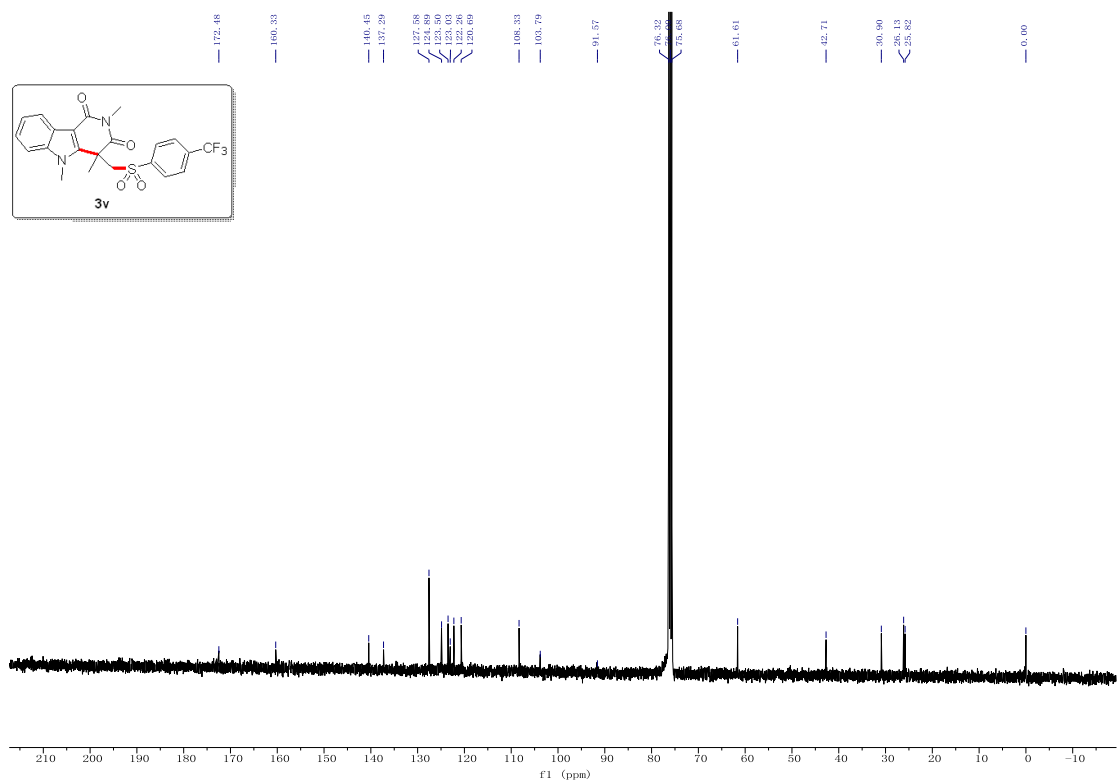

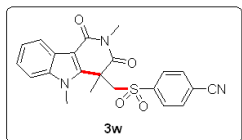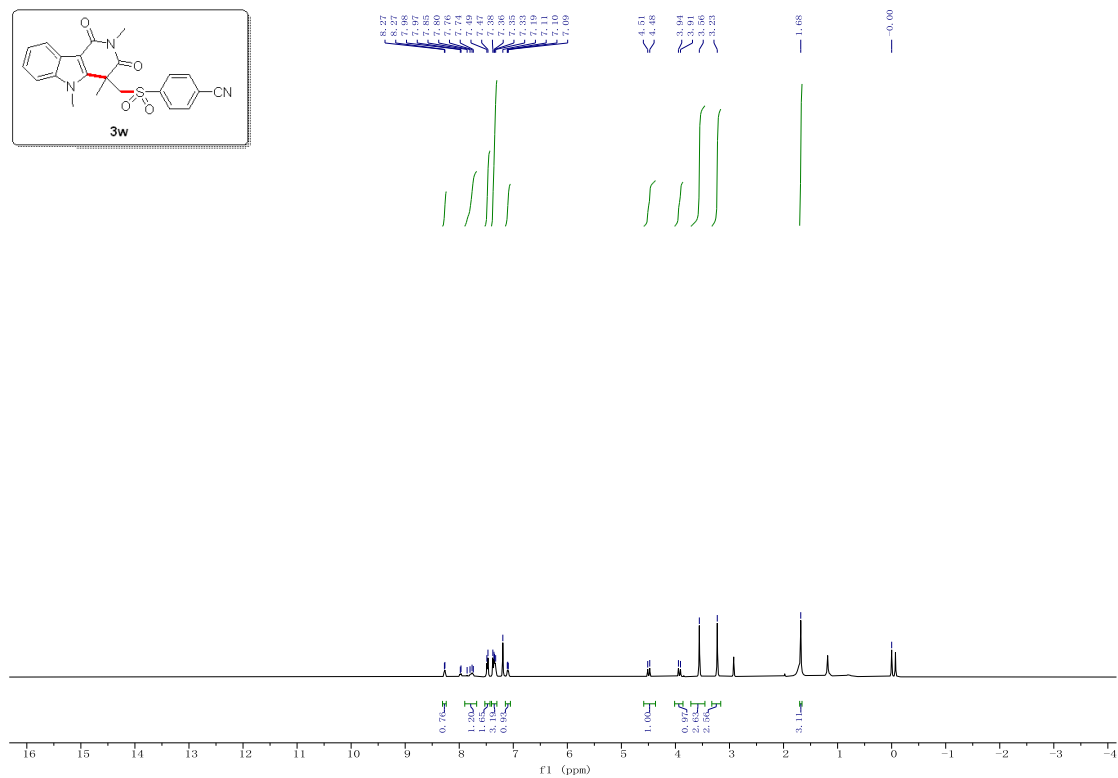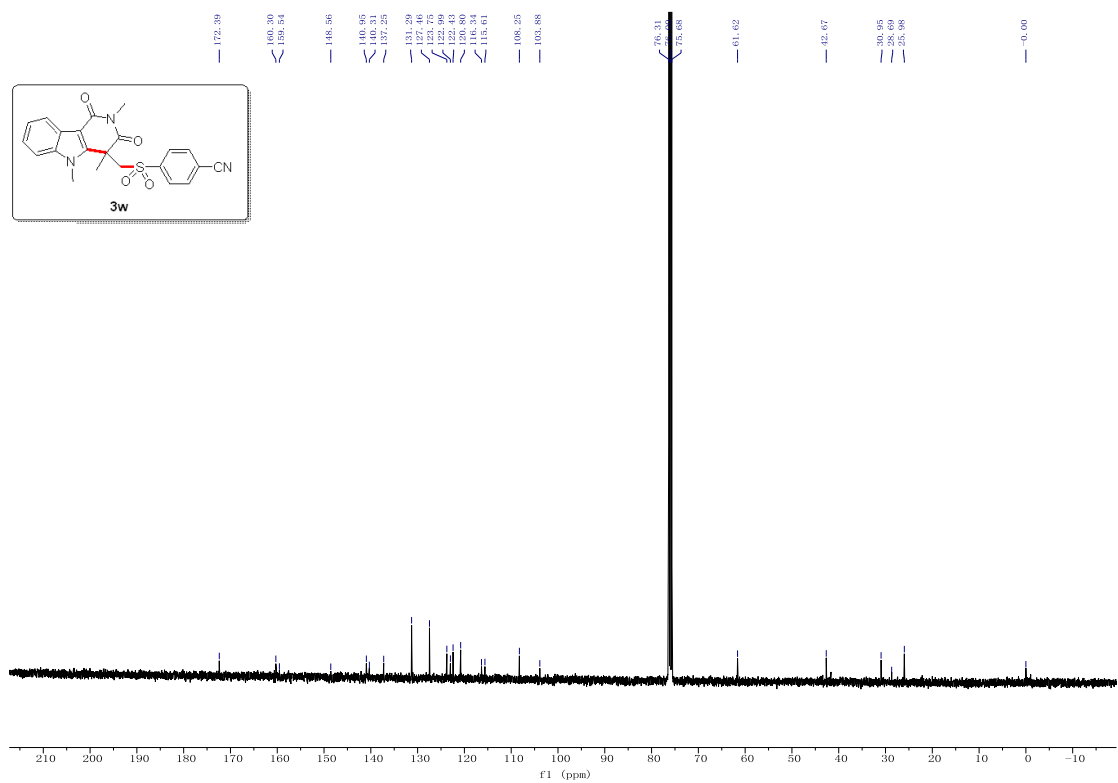

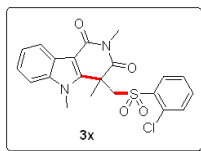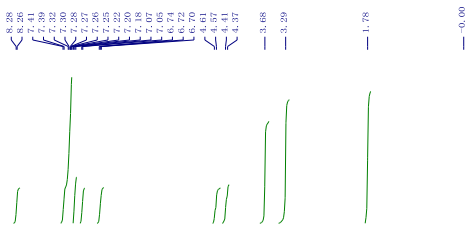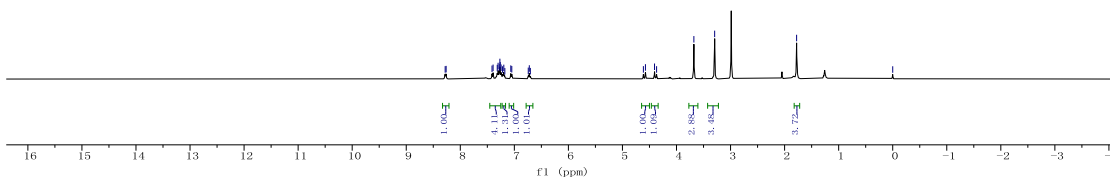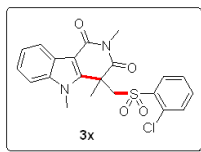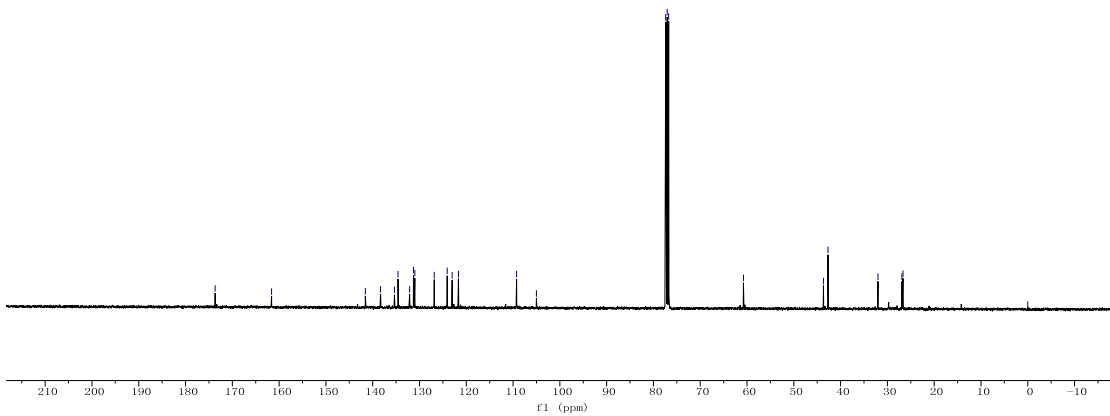

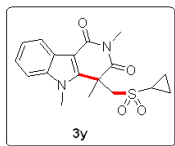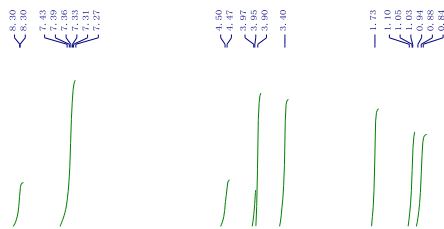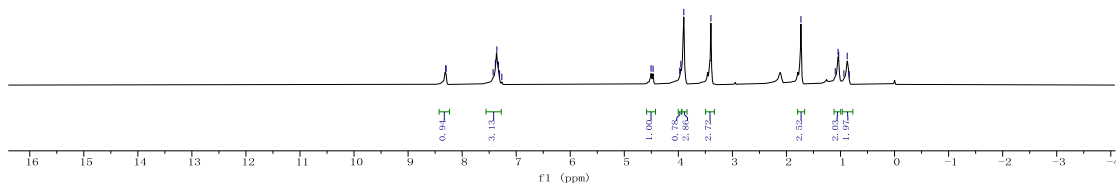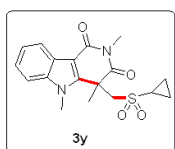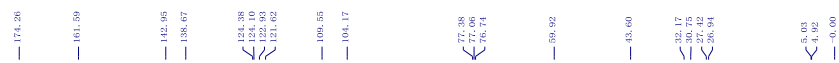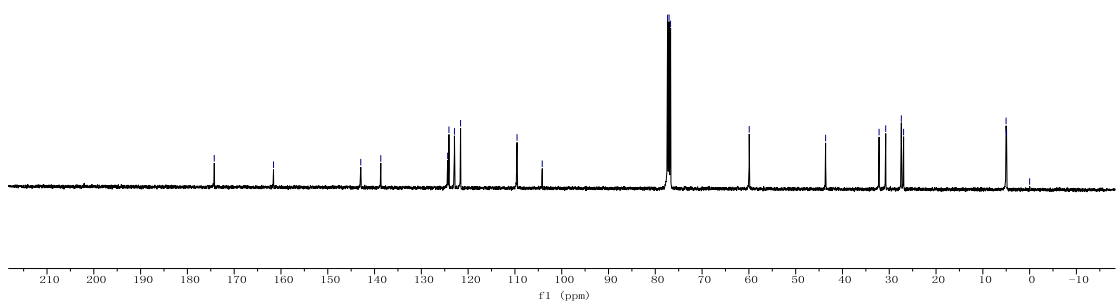

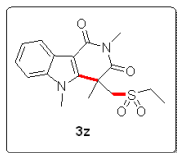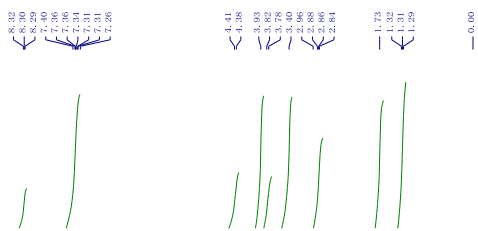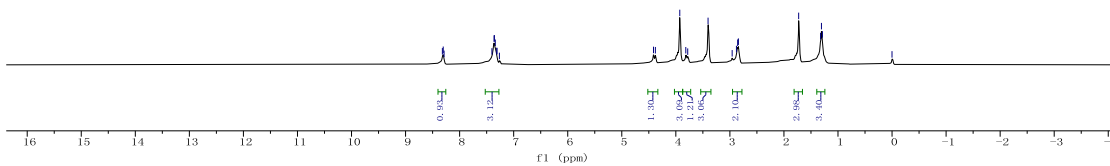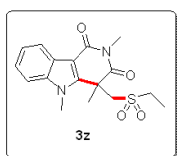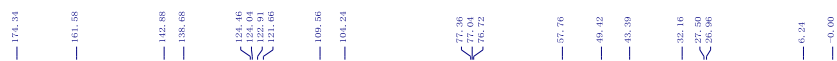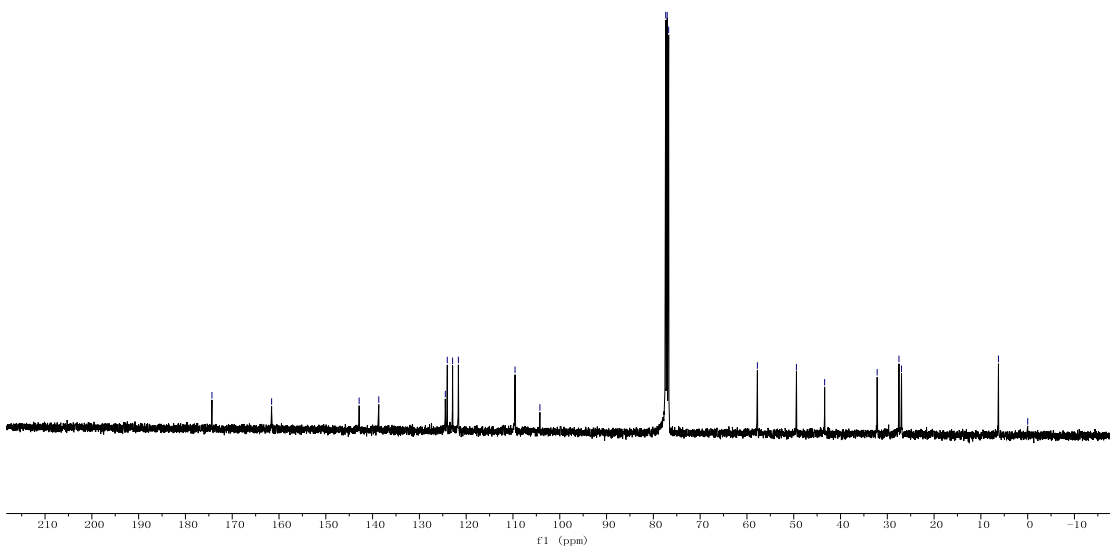

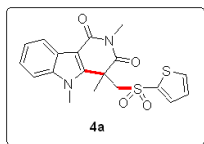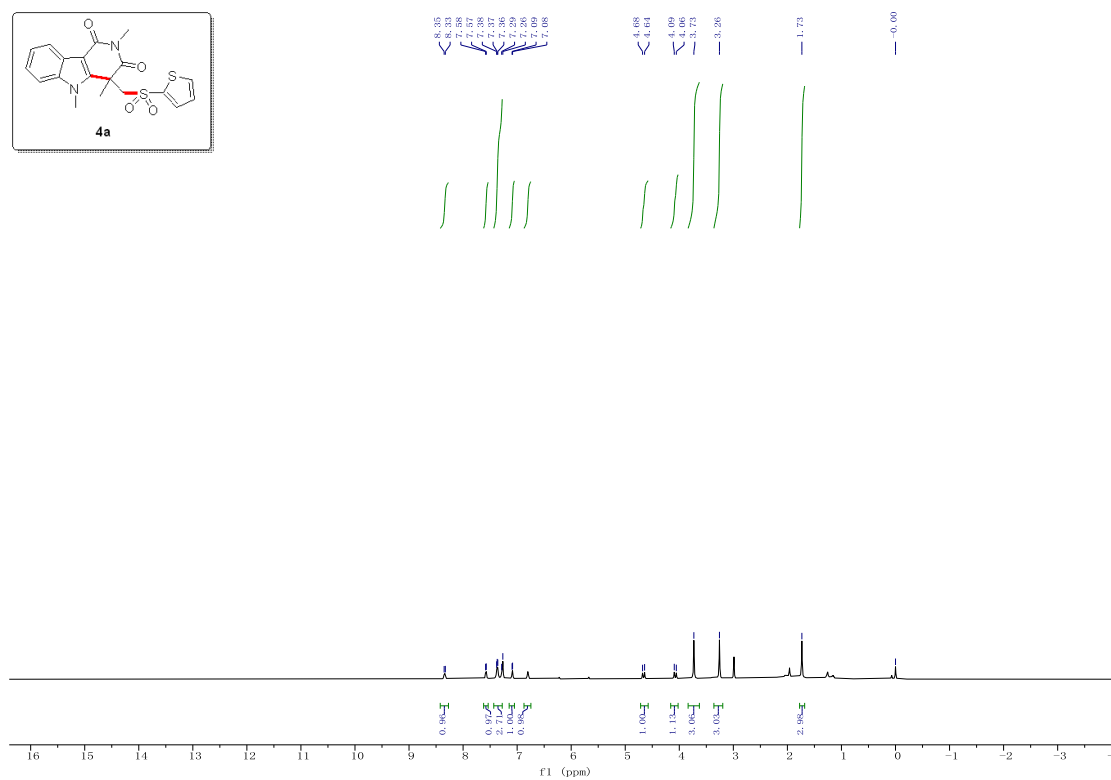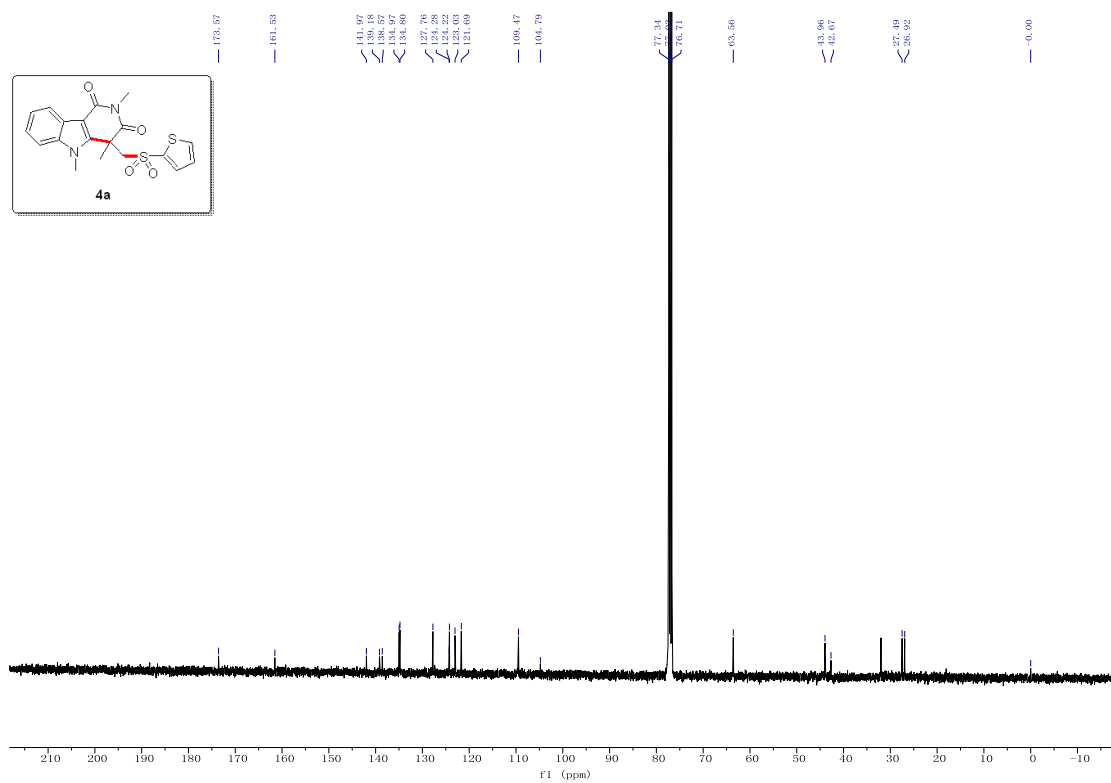

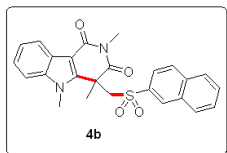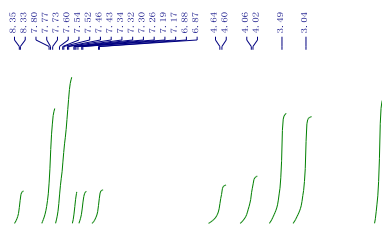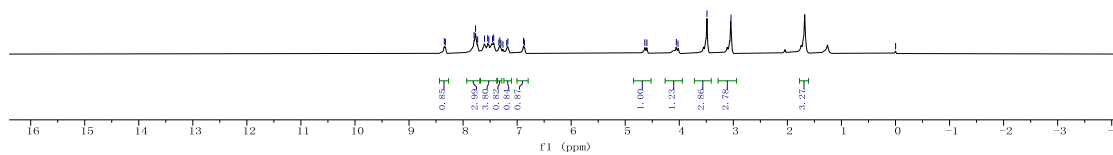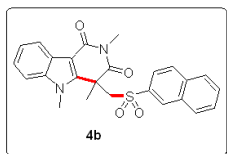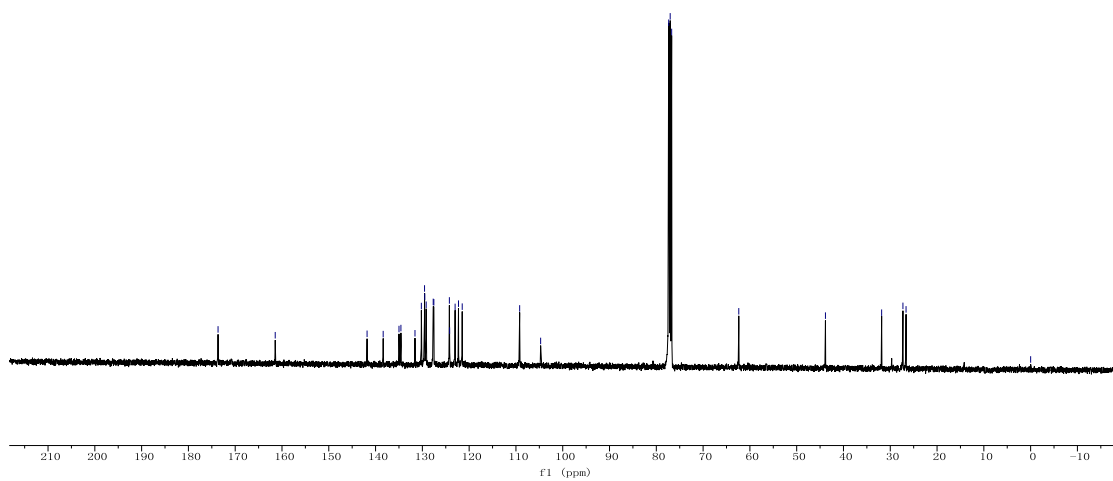

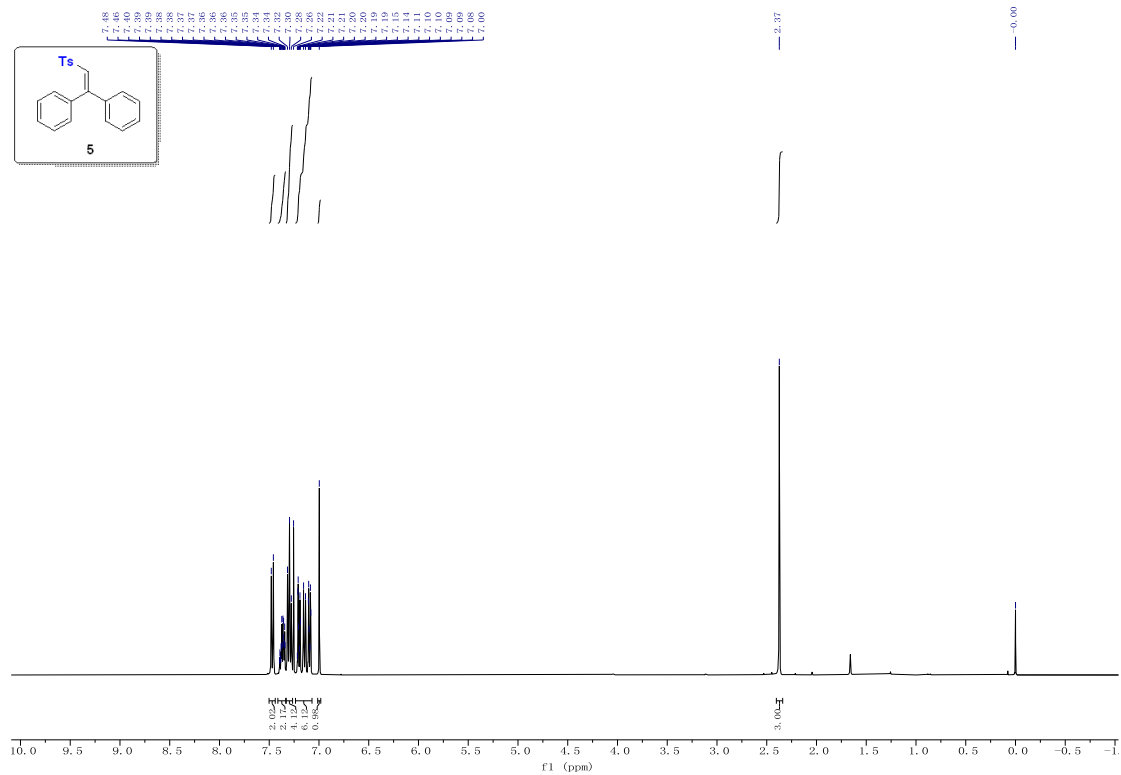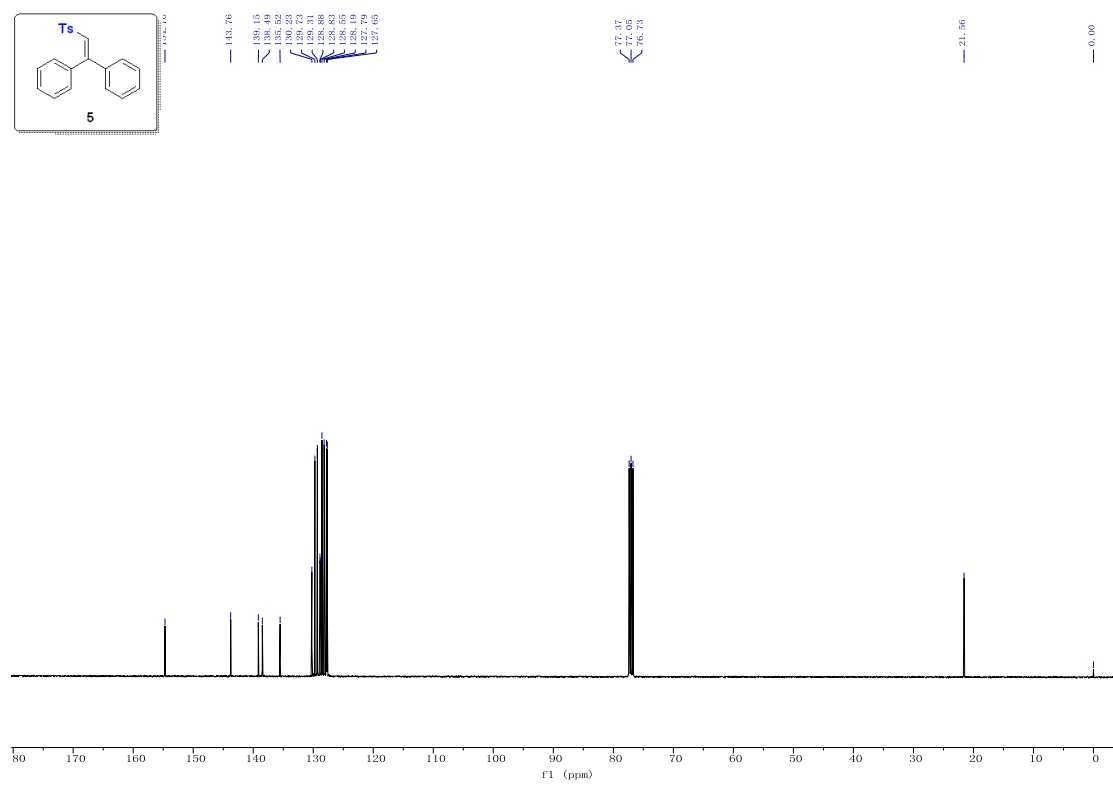

Supplement: d4ra08000a1.pdf [file d4ra08000a1.pdf]
